# Supplementary material for: Childhood parasitic infections and gastrointestinal illness in indigenous communities at Lake Atitlán, Guatemala
Source: PeerJ. 2021 Nov 17;9:e12331. doi: 10.7717/peerj.12331 (PMC8605761; doi:10.7717/peerj.12331)

## Buenas prácticas de higiene

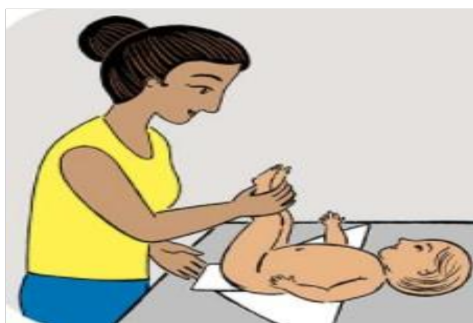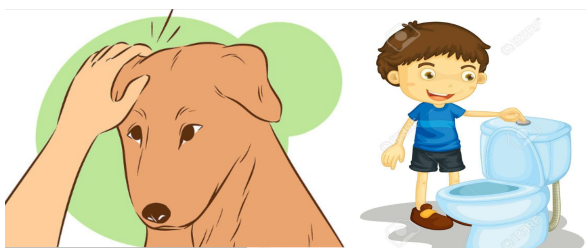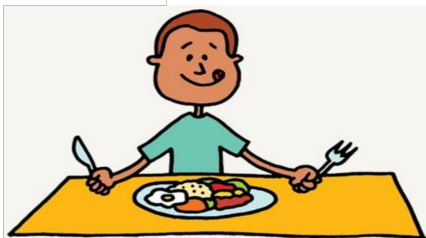

1

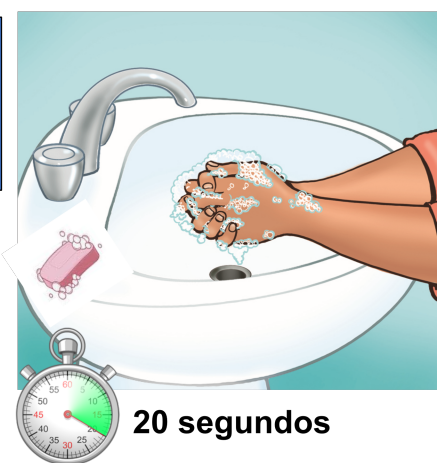

2

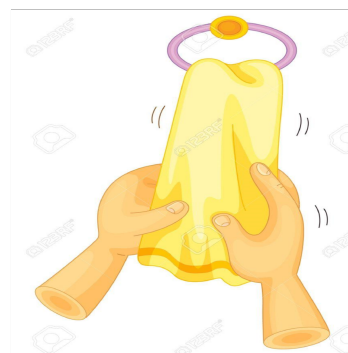

# Purificación de agua en hogar

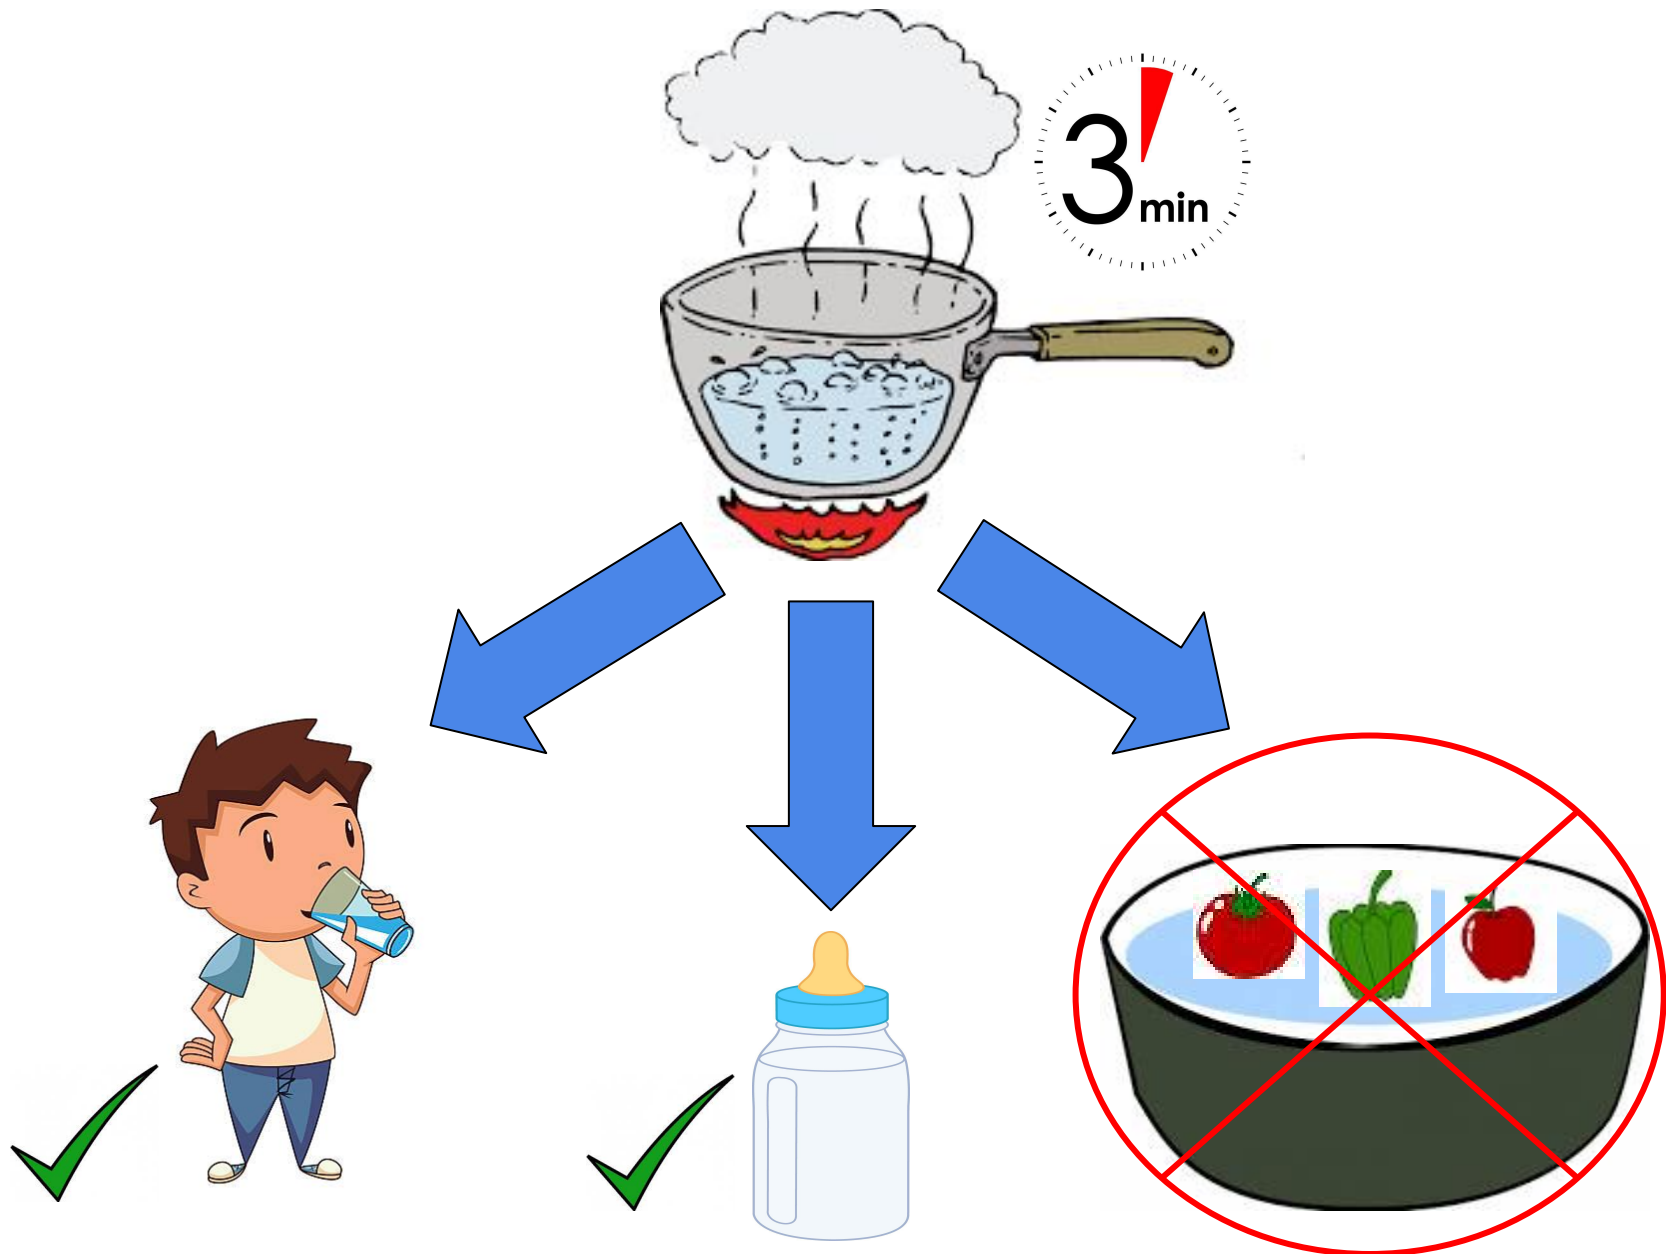

# Preparación de comida

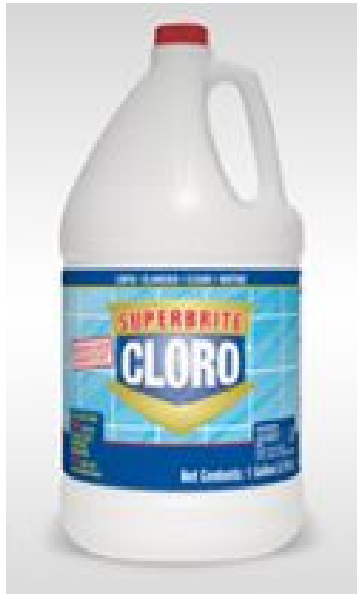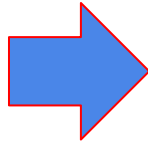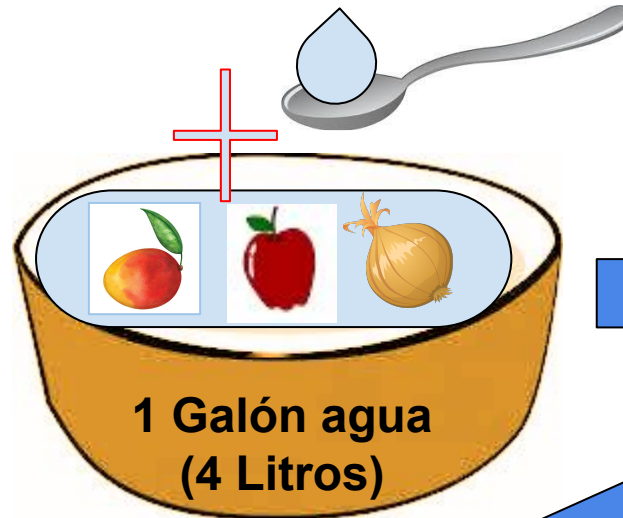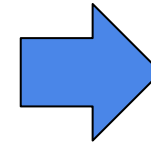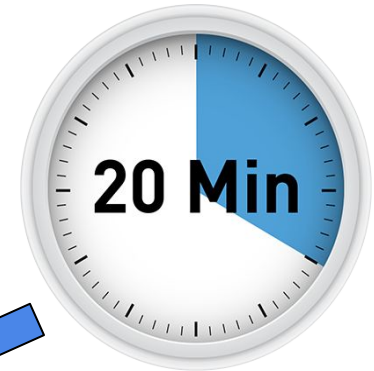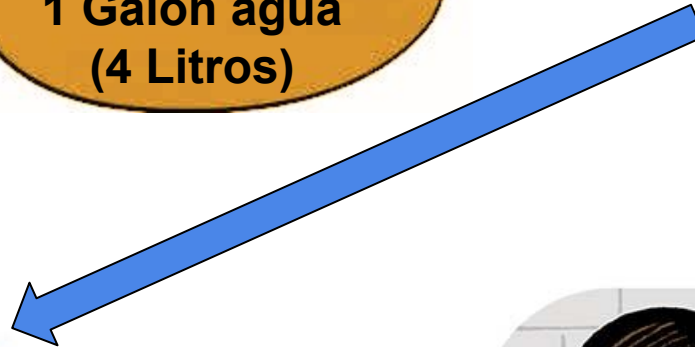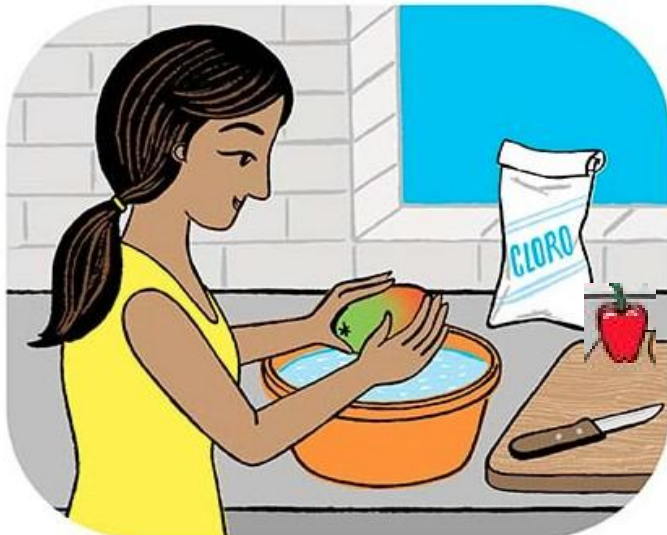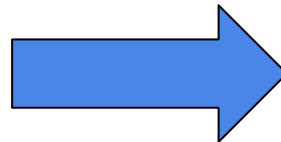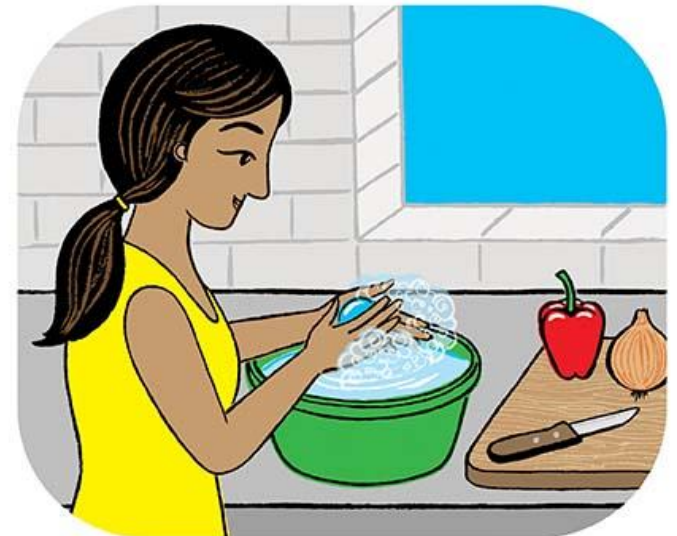

# Purificación de agua con cloro

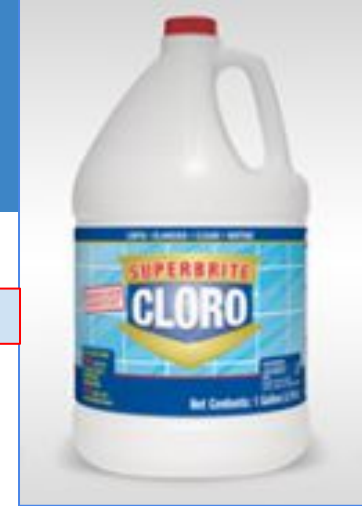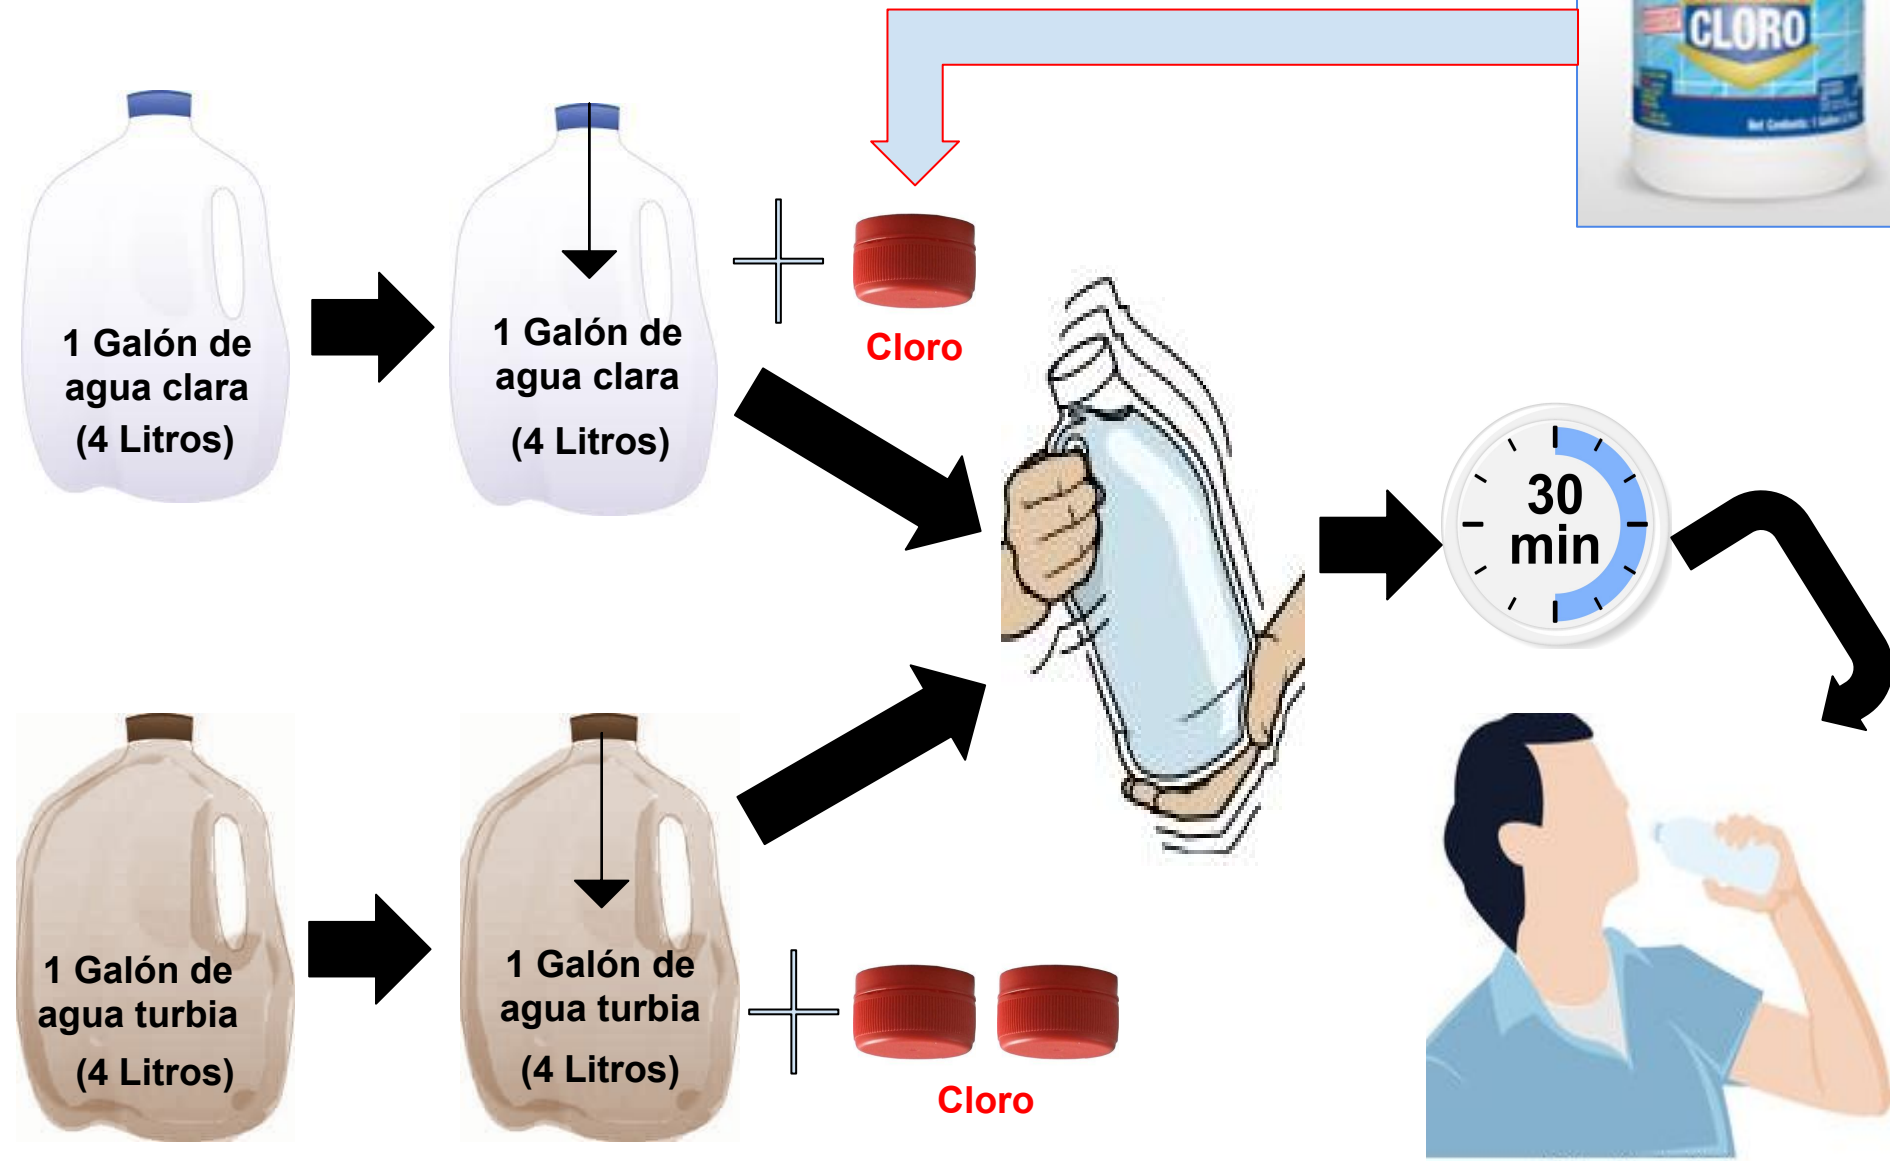

Supplement: Supplemental Information 1 — Participants received educational training in how to reduce risks for their children and others in their family from water borne diseases, including information on water treatment options. [file peerj-09-12331-s001.pdf]
