# Supplementary material for: Childhood parasitic infections and gastrointestinal illness in indigenous communities at Lake Atitlán, Guatemala
Source: PeerJ. 2021 Nov 17;9:e12331. doi: 10.7717/peerj.12331 (PMC8605761; doi:10.7717/peerj.12331)
Supplement: Supplemental Information 5 — Categorical designations correspond with questionnaire answers. [file peerj-09-12331-s005.xlsx]

## Sheet: Sheet1
Identifier	Locations	age_months	gender	height_cm	weight_kgs	BMI	temp_Celsius	HR_bpm	RR_bpm	zscore_height	WHO_BMI_zscore	Giardia	Cryptosporidium	Giardia_Triage	Cryptosporidium_Triage	Entemoeba_Triage	chronic_gi	lake_water	spring_water	municipal _water	bottle_water	water_treatment	boiling	cloth_filter	bleach	clay_filter	carbon_filter	candle_filter	sand_filter	filtered_unspecified	untreated_fruit&vegetables	untreated_dishwash	animals	chickens	cats	dogs	other	frequency_diarrhea	frequency_vomiting	frequency_fever	other_children	number_children	other_diarrhea	freq_diarrhea	other_vomit	freq_vomit	type_sanitation_waste	shared	open_access
AE001	AE	3	M	53.34	4.54545	15.9761	37.5	68	14	<-3.0	-1	negative	negative				N	N	Y	N	N	N	N	N	N	N	N	N			tap water	Y	Y	Y	N	N	N	a	a	a	Y	6	N	a	N	a	latrine	N	Y
AE002	AE	24	F	73.66	8.40909	15.4984	37.5	68	14	<-3.0	-0.5	negative	negative				N	N	Y	N	N	N	N	N	N	N	N	N			tap water	Y	Y	Y	N	N	N	b	b	b	Y	6	Y	b	N	a	latrine	N	N
AE003	AE	36	M	91.44	13.6364	16.309	37.5	68	14	-1.5	1	negative	negative	negative	negative	negative	N	N	Y	N	N	N	N	N	N	N	N	N			tap water	Y	Y	Y	N	N	N	b	b	b	Y	6	Y	b	N	a	latrine	N	N
AE004	AE	15	F	71.12	9.54545	18.8718	37.5	64	12	-2.5	2	negative	negative				N	N	Y	N	N	N	N	N	N	N	N	N			tap water	Y	Y	Y	N	N	N	b	a	b	Y	8	Y	b	Y	b	latrine	N	N
AE005	AE	40	M	91.44	14.5455	17.3962	37.5	72	16	-2	1	positive	negative				N	N	Y	N	N	N	N	N	N	N	N	N			tap water	Y	Y	Y	N	N	N	b	b	b	Y	8	Y	b	Y	b	latrine	N	N
AE006	AE	48	M	111.76	17.7273	14.1928	37.9	64	12	2	-1	negative	negative				N	N	Y	N	N	N	N	N	N	N	N	N			tap water	Y	Y	Y	N	N	N	b	b	b	Y	8	Y	b	Y	b	latrine	N	N
AE009	AE	24	F	82.55	9.54545	14.0076	37.3	86	14	-1	-1	negative	positive				N	N	Y	N	N	Y	Y	N	N	N	N	N				N	Y	Y	N	Y	N	b	c	b	Y	1	N	a	N	a	latrine	N	N
AE010	AE	35	M	93.98	14.5455	16.4686	38	88	14	0	0	negative	negative	negative	negative	negative	N	N	Y	N	N	Y	Y	N	N	N	N	N				N	Y	N	N	Y	N	b	a	b	Y	3	N	a	N	a	latrine	N	N
AE012	AE	5	F	60.96	6.13636	16.5128	37.5	78	12	-1	0	negative	negative	negative	negative	negative	N	N	Y	Y	N	Y	Y	N	N	N	N	N				N	Y	Y	Y	Y	N	b	a	a	N	0					latrine	N	N
AE013	AE	24	F	81.28	10.4545	15.8248	37.5	68	14	-2	0.5	negative	negative	negative	negative	negative	N	N	Y	N	N	Y	Y	N	N	N	N	N				N	Y	Y	N	N	N	b	a	b	N	0					toilet	N	N
AE014	AE	24	F	83.82	10.9091	15.5272	37.5	72	14	>3.0	0.5	negative	negative	negative	negative	negative	N	N	Y	Y	N	Y	Y	N	Y	N	N	N				N	Y	Y	N	N	N	a	a	b	N	0					latrine	N	N
AE015	AE	36	M	83.82	11.3636	16.1742	37.5	80	15	-3	0	negative	negative	negative	negative	negative	N	N	Y	Y	N	Y	Y	N	N	N	N	N				N	Y	Y	N	N	N	b	b	b	Y	1	N	b	N	g	latrine	N	N
AE016	AE	23	M	86.36	13.1818	17.6746	37.5	78	12	0	2	negative	negative	negative	negative	negative	N	N	N	Y	N	N	N	N	N	N	N	N			tap water	Y	Y	Y	N	N	N	b	b	b	Y	2	N	a	N	a	latrine	N	N
AE017	AE	48	F	101.6	15.4545	14.9716	37.5	68	14	0	0	negative	negative	negative	negative	negative	N	N	Y	N	N	Y	Y	N	N	N	N	N				N	Y	Y	N	N	N	b	b	b	Y	2	Y	b	N	a	latrine	Y	N
AE018	AE	48	M	101.6	16.3636	15.8523	37.5	72	14	0	0.5	negative	negative	negative	negative	negative	N	N	Y	Y	Y	Y	Y	N	N	N	N	N				N	N	N	N	N	N	d	d	d	Y	2	Y	c	Y	c	latrine	N	N
AE019	AE	36	F	92.71	15.9091	18.5094	37.5	78	14	-1	2.5	negative	negative	negative	negative	negative	N	N	Y	Y	Y	Y	Y	N	N	N	N	N				N	N	N	N	N	N	c	c	d	Y	2	Y	d	Y	d	latrine	N	N
AE021	AE	24	M	81.28	11.8182	17.8889	37.5	92	12	-2.5	2	negative	negative	negative	negative	negative	N	N	Y	Y	N	Y	Y	N	N	N	N	N				N	N	N	N	N	N	a	a	a	Y	1	Y	b	Y	b	latrine	N	Y
AE022	AE	48	M	93.98	15.9091	18.0125	37.5	72	112	-2	2	negative	negative				N	N	Y	Y	N	Y	Y	N	N	N	N	N				N	N	N	N	N	N	b	b	b	Y	1	Y	b	N	b	latrine	N	N
AE023	AE	23	F	77.47	9.54545	15.9048	37.5	78	12	-2.5	0.5	positive	negative	negative	negative	negative	N	N	N	Y	N	Y	Y	N	N	N	N	N				N	Y	Y	N	Y	N	b	a	b	Y	1	N	a	N	a	latrine	N	N
AE024	AE	48	M	87.63	12.7273	16.5741	37.5	72	12	-3	1	negative	negative	negative	negative	negative	N	N	Y	Y	N	Y	Y	N	Y	N	N	N				N	Y	N	N	Y	N	e	a	b	Y	1	Y	b	Y	b	latrine	Y	Y
AE026	AE	32	M	85.09	12.2727	16.9506	38.5	70	14	-2.5	1	negative	negative	negative	negative	negative	N	N	Y	N	N	Y	Y	N	N	N	N	N				N	Y	Y	N	N	N	b	b	b	N	0					latrine	N	N
AE027	AE	24	F	78.74	10	16.1291	37.5	68	12	-2	0.5	negative	negative	negative	negative	negative	N	N	Y	N	N	Y	Y	N	N	N	N	N				N	Y	Y	N	Y	Y	b	b	b	Y	1	N	b	N	a	latrine	N	N
AE028	AE	36	F	91.44	14.5455	17.3962	37.5	88	12	-1	1	negative	negative	negative	negative	negative	N	N	Y	Y	Y	Y	Y	N	N	Y	N	N				N	Y	N	Y	Y	N	a	a	a	Y	3	Y	d	N	b	latrine	N	Y
AE029	AE	59	M	105.41	16.3636	14.7271	37.5	68	12	-1	0	negative	negative	negative	negative	negative	N	N	N	Y	N	Y	Y	N	N	N	N	N				N	N	N	N	N	N	b	a	b	Y	7	N	g	N	a	toilet	Y	Y
AE030	AE	59	F	104.14	17.7273	16.3458	37.5	88	12	-1	0.5	negative	negative	negative	negative	negative	N	N	Y	N	N	Y	Y	N	N	N	N	N				N	N	N	N	N	N	d	a	b	Y	1	N	a	N	a	toilet	Y	Y
AE031	AE	24	F	91.44	10	11.9599	38.5	68	12	1.5	-3	negative	positive	negative	negative	negative	N	N	Y	Y	Y	N	N	N	N	N	N	N			tap water	Y	Y	Y	N	N	Y	c	b	b	Y	1	N	b	N	c	latrine	Y	N
AE032	AE	48	F	97.79	14.7727	15.448	37.5	68	14	-1	0	negative	negative	negative	negative	negative	N	N	Y	Y	N	Y	Y	N	N	N	N	N				N	Y	Y	N	Y	N	b	b	b	N	0					none	N	N
AE033	AE	15	F	71.12	5.90909	11.6825	37.5	64	12	-2	-3	negative	negative				Y	N	Y	Y	N	Y	Y	N	Y	N	N	N				N	Y	Y	N	N	N	c	a	d	Y	1	Y	d	N	a	latrine	Y	N
AE034	AE	13	F	66.04	8.18182	18.7601	37.5	68	12	-3	2	negative	negative	negative	negative	negative	N	N	Y	N	N	Y	Y	N	N	N	N	N				N	Y	Y	N	N	N	b	a	b	Y	6	Y	b	Y	b	latrine	N	N
AE035	AE	54	F	101.6	14.3182	13.8708	37.5	68	12	-0.5	-1	negative	negative	negative	negative	negative	N	N	Y	Y	N	Y	Y	N	N	N	N	N				N	Y	N	N	Y	N	b	b	b	N	0					latrine	N	N
AE036	AE	12	F	68.58	7.27273	15.4633	37.5	64	12	0	-1	negative	negative	positive	negative	negative	Y	N	Y	Y	N	Y	Y	N	N	N	Y	N				N	Y	Y	N	N	N	f	a	f	Y	9	Y	c	N	c	latrine	Y	Y
AE038	AE	48	M	97.79	16.8182	17.5869	37.5	72	14	-1	2	negative	negative	negative	negative	negative	N	N	Y	Y	N	Y	Y	N	N	N	Y	N				N	Y	Y	N	N	N	e	a	e	Y	4	N	e	N	f	latrine	N	N
AE039	AE	24	M	83.82	10	14.2333	37.5	68	14	-1	-1.5	negative	negative	negative	negative	negative	N	N	Y	Y	N	Y	Y	N	Y	N	N	N				N	Y	Y	Y	Y	Y	b	b	b	N	0					latrine	N	N
AE040	AE	48	F	93.98	15.9091	18.0125	37.5	68	14	-2	1.5	negative	negative	negative	negative	negative	N	N	Y	Y	N	N	N	N	N	N	N	N			tap water	Y	Y	N	Y	Y	N	b	b	b	Y	2	N	b	N	a	latrine	Y	N
AE043	AE	12	M	83.82	7.27273	10.3515	37.5	64	14	3	<-3.0	negative	negative	negative	negative	negative	N	N	Y	Y	N	Y	Y	N	N	N	N	N				N	Y	N	N	Y	Y	b	b	b	N	0					suspended_latrine	N	Y
AE044	AE	17	M	76.2	10.9091	18.7879	37.5	64	14	-2	2	negative	negative				N	N	Y	Y	N	Y	N	N	N	Y	N	N				Y	Y	Y	Y	N	N	g	a	b	Y	3	N	g	N	g	latrine	N	N
AE045	AE	25	F	87.63	10.9091	14.2064	37.5	64	14	0.5	-1.5	negative	negative	negative	negative	negative	N	N	Y	Y	N	Y	Y	N	N	N	N	Y				N	N	N	N	N	N	b	b	b	Y	2	N	a	N	a	latrine	N	N
AE046	AE	3	F	55.88	6.81818	21.8351	37.5	84	12	-2	3	negative	negative	negative	negative	negative	N	N	N	Y	N	Y	Y	N	N	N	N	N				N	Y	N	N	Y	N	a	a	a	Y	1	N	a	N	a	latrine	N	N
AE048	AE	24	F	91.44	12.2727	14.6781	37.5	84	12	1.5	-0.5	negative	negative	negative	negative	negative	N	N	Y	Y	N	Y	Y	N	N	N	N	N				N	Y	Y	N	Y	N	b	a	b	Y	1	Y	b	N	a	suspended_latrine	Y	Y
AE049	AE	48	M	99.06	15.9091	16.2125	37.5	64	12	-1	1	negative	negative	negative	negative	negative	N	N	Y	Y	N	Y	Y	N	N	N	N	N				N	Y	Y	N	Y	N	b	a	a	Y	1	Y	b	N	a	latrine	N	N
AE052	AE	9	M	63.5	7.95455	19.7273	37.5	84	12	-3	2.5	negative	negative	negative	negative	negative	N	N	N	Y	N	Y	N	N	N	Y	N	N				N	Y	Y	N	N	N	a	a	a	Y	4	N	a	Y	b	latrine	N	N
AE053	AE	48	F	93.98	13.1818	14.9247	37.5	64	12	-2	0	negative	negative	negative	negative	negative	N	N	Y	Y	N	Y	Y	N	N	N	N	N				N	N	N	N	N	N	b	a	b	N	0					latrine	N	N
AE054	AE	18	M	91.44	14.2	16.9831	37.5	68	14	3	1	negative	negative	negative	negative	negative	N	N	Y	Y	N	N	N	N	N	N	N	N			tap water	Y	N	N	N	N	N	b	a	f	Y	1	Y	f	Y	g	suspended_latrine	Y	N
AE055	AE	24	F	76.2	9.09091	15.6566	39	68	12	-3	0.5	negative	negative	negative	negative	negative	N	N	N	Y	N	Y	Y	N	N	N	N	N				N	N	N	N	N	N	c	b	b	Y	2	Y	d	Y	b	latrine	N	N
AE056	AE	4	M	60.96	5	13.4549	37.5	68	14	-2	<-3.0	negative	negative	negative	negative	negative	N	N	Y	Y	N	Y	Y	N	N	N	N	N				Y	Y	N	Y	Y	N	f	e	a	N	0					latrine	Y	N
AE057	AE	48	F	110.49	14.5455	11.9147	37.5	72	14	1.5	-3	negative	negative	negative	negative	negative	N	N	Y	N	N	Y	Y	N	N	N	N	N				chlorinated	Y	Y	Y	Y	Y	b	a	b	N	0					latrine	N	N
AE058	AE	48	F	92	16.3636	19.3332	37.1	82	20	-2.5	2.5	negative	negative				N	N	N	Y	N	Y	Y	N	N	N	N	N				N	Y	Y	N	N	N	b	b	b	Y	2	N	b	N	a	suspended_latrine	N	N
AE059	AE	12	M	60	5.45455	15.1515	37	120	20	<-3.0	-1.5	negative	negative				N	N	Y	N	N	Y	Y	N	N	N	Y	N				Y	N	N	N	N	N	a	a	a	N	0					unsure	N	N
AE060	AE	12	F	61	5.90909	15.8804	36.9	90	4	<-3.0	0	negative	negative				N	N	Y	N	N	Y	Y	N	N	N	Y	N				Y	N	N	N	N	N	a	a	a	N	0					unsure	N	N
MF 120	PA	36	M	88	12	15.4959	36.7778	84	16	-2	-0.5	positive	negative	negative	negative	negative	N	N	N	N	Y	N	N	N	N	N	N	N				Y	Y	N	Y	Y	N	b	b	b	Y	3	Y	c	N	a	latrine	Y	N
MF 121	PA	36	F	100	15.3	15.3	36.6667	84	16	1	0	negative	negative	negative	negative	negative	N	N	N	N	Y	N	N	N	N	N	N	N				Y	N	N	N	N	N	e	a	b	Y	4	N	b	N	a	latrine	uncertain	N
MF 122	PA	54	M	130	16	9.46746	36.9444	86	16	>3.0	<-3.0	negative	negative				N	N	Y	N	N	Y	Y	N	N	N	N	N				N	N	N	N	N	N	b	a	b	Y	2	N	a	Y	b	suspended_latrine	Y	N
MF 123	PA	48	F	106	17.9	15.9309	36.7222	80	20	>3.0	0.5	negative	negative	negative	negative	negative	N	N	N	Y	N	Y	N	N	Y	N	N	N				N	Y	N	N	N	Y	a	a	b	N	0					suspended_latrine	N	N
MF 124	PA	52	M	96	15.6	16.9271	36.1667	80	18	-1	1	negative	negative				N	N	Y	N	N	Y	N	N	N	N	Y	N			tap water	Y	N	N	N	N	N	b	a	b	Y	7	Y	b	N	a	suspended_latrine	N	N
MF 125	PA	48	M	93	14.3	16.5337	35.5556	84	20	-2.5	1	negative	negative				Y	N	N	Y	N	Y	N	N	N	N	Y	N			tap water	Y	Y	Y	N	Y	N	b	b	b	N	0					suspended_latrine	N	N
MF 126	PA	48	M	96	13.7	14.8655	35.6667	68	16	-2	0	negative	negative				N	N	Y	N	N	Y	N	N	N	N	Y	N			tap water	Y	Y	N	N	Y	N	b	a	b	Y	3	Y	g	Y	g	suspended_latrine	Y	N
MF 127	PA	48	M	101	17	16.665		61	20	-0.5	1	negative	negative				Y	N	N	Y	N	Y	N	N	N	N	Y	N			tap water	Y	Y	N	Y	Y	N	b	b	a	Y	5	N	b	N	a	suspended_latrine	Y	N
MF 128	PA	24	F	86	10.3	13.9264	36.3889	88	16	0	-1	negative	negative				N	Y	N	N	Y	N	N	N	N	N	N	N			tap water	Y	N	N	N	N	N	d	c	b	N	0					suspended_latrine	N	N
MF 129	PA	36	F	89	12.1	15.2758	36.2222	180	70	-1.5	0	negative	negative				N	N	Y	N	N	Y	N	N	N	N	Y	N			tap water	Y	N	N	N	N	N	b	a	b	Y	4	Y	b	N	g	suspended_latrine	N	N
MF 130	PA	24	M	64	12.5	30.5176	36.3889	124	60	<-3.0	>3.0	negative	negative				N	N	Y	N	N	Y	N	N	Y	N	N	N				N	Y	N	N	N	Y	b	b	b	Y	3	Y	g	Y	g	suspended_latrine	Y	N
MF 131	PA	48	F	120	12.5	8.68056	37	80	20	>3.0	<-3.0	negative	negative				Y	N	N	Y	N	Y	N	N	N	N	N	N		Y	tap water	Y	Y	N	N	N	Y	b	b	b	Y	4	N	a	Y	b	suspended_latrine	Y	Y
MF 147	PA	36	F	100	16	16	36.5	100	60	0	0.5	negative	negative				N	N	N	Y	N	Y	Y	N	N	N	N	N			tap water	Y	N	N	N	N	N	b	a	b	N	0					suspended_latrine	N	N
MF 148	PA	48	F	93	12.7	14.6838	36.1667	70	18	-2.5	0	negative	negative	negative	negative	negative	Y	Y	N	N	N	Y	Y	N	N	N	N	N				N	N	N	N	N	N	c	b	b	Y	6	N	a	N	a	latrine	Y	N
MF 149	PA	48	M	91	13.7	16.5439	37.5	100	22	-3	1	negative	negative	negative	negative	negative	N	N	Y	N	N	Y	N	N	Y	N	N	N			tap water	Y	N	N	N	N	N	b	b	b	Y	2	Y	b	Y	b	suspended_latrine	N	Y
MF 150	PA	55	F	90	12.7	15.679	36.5556	80	20	<-3.0	0.5	negative	negative				N	N	Y	N	N	Y	N	N	N	N	Y	N				N	Y	N	N	Y	N	a	a	b	Y	3	N	a	N	g	latrine	N	N
MF 151	PA	36	M	106	19.9	17.7109	36.9444	80	20	2.5	2	negative	negative				N	N	N	Y	N	Y	N	N	N	N	Y	N				N	Y	N	Y	Y	N	a	b	b	Y	3	Y	b	Y	b	latrine	N	Y
MF 153	PA	48	F	94.5	13.6	15.2291	35.8333	120	10	-1.5	0	negative	negative	negative	negative	negative	N	N	N	Y	N	N	N	N	N	N	N	N			tap water	Y	N	N	N	N	N	c	c	b	Y	3	Y	b	Y	b	suspended_latrine	N	N
MF 154	PA	48	M	96	14.3	15.5165	36.1667	80	20	-2	0.5	positive	negative	negative	negative	negative	N	Y	N	N	N	Y	Y	N	N	N	N	N				N	N	N	N	N	N	c	a	a	Y	2	Y	c	N	a	suspended_latrine	N	N
MF 155	PA	48	M	96	13.7	14.8655	36.9444	80	16	-2	0	negative	negative				N	N	N	Y	N	Y	Y	N	N	N	Y	N				Y	Y	N	N	Y	N	b	b	b	Y	2	Y	b	Y	b	suspended_latrine	N	N
MF 156	PA	48	M	100	14.8	14.8	36.8333	76	18	-1	0	negative	negative				N	N	N	N	Y	Y	Y	N	N	N	Y	N				N	Y	N	N	Y	N	b	b	b	Y	2	Y	b	Y	b	suspended_latrine	N	N
MF 157	PA	48	M	100	15.5	15.5	36.9444	76	20	-1	0.5	negative	negative				N	N	N	Y	N	Y	N	N	N	N	Y	N			tap water	Y	N	N	N	N	N	c	c	c	N	0					suspended_latrine	uncertain	N
MF 158	PA	36	M	90	13	16.0494		80	25	-1.5	0.5	negative	negative				N	Y	N	N	N	Y	Y	N	N	N	N	N				N	Y	Y	Y	Y	N	e	a	a	Y	3	N	a	N	a	latrine	N	N
MF 165	PA	3	M	58	5.7	16.9441	36.7778	120	30	-2	0	negative	negative				N	N	N	N	Y	N	N	N	N	N	N	N				N	Y	N	Y	Y	N	a	a	b	Y	3	Y	b	N	a	latrine	Y	N
MF 166	PA	48	M	95	14	15.5125	37.5	70	24	-2	0.5	positive	negative	negative	negative	negative	N	N	N	Y	N	N	N	N	N	N	N	N			tap water	Y	N	N	N	N	N	f	a	b	Y	6	Y	f	N	a	latrine	Y	N
MF 167	PA	48	M	102	16.1	15.4748	37.5	80	20	-1	0	negative	negative				N	N	N	Y	N	Y	Y	N	N	N	N	N			tap water	Y	N	N	N	N	N	b	b	b	Y	4	Y	b	Y	b	suspended_latrine	Y	N
MF 169	PA	48	M	96	18	19.5312	36.4444	80	20	-2	3	negative	negative				N	N	N	Y	N	Y	Y	N	N	N	N	N				Y	Y	N	N	Y	N	a	b	b	Y	3	Y	b	Y	b	latrine	N	N
MF 170	PA	48	M	103	15.8	14.893	36.1111	96	40	-1	0	negative	negative				N	N	N	N	Y	Y	Y	N	N	N	N	N				Y	Y	Y	N	N	N	a	b	a	Y	2	Y	c	Y	e	latrine	Y	N
MF 171	PA	60	M	97	16.6	17.6427	36.9444	82	18	-2.5	2	negative	negative				N	N	N	Y	N	Y	Y	N	N	N	N	N				Y	Y	N	N	Y	N	b	b	b	Y	2	N	a	N	a	latrine	N	N
MF 172	PA	9	M	69	9.1	19.1136	36.0556	168	70	<-3.0	1	negative	negative				N	N	N	Y	N	Y	Y	N	N	N	N	N				Y	Y	Y	N	Y	N	b	a	b	Y	3	Y	a	N	a	latrine	Y	N
SA 001	SA	36	M	90	12.2	15.0617	35.7	76	18	-1.5	-0.5	negative	positive	negative	negative	negative	Y	Y	N	N	N	N	N	N	N	N	N	N			tap water	Y	N	N	N	N	N	c	c	c	Y	1	Y	g	N	g	latrine	Y	Y
SA 003	SA	48	M	99	14.6	14.8964	35.7	80	16	-1	0	negative	negative	negative	negative	negative	Y	Y	N	N	N	N	N	N	N	N	N	N			tap water	Y	N	N	N	N	N	b	a	g	N	0					suspended_latrine	Y	N
SA 005	SA	36	F	94	13.4	15.1652	35.7222	84	30	-0.5	-0.5	negative	negative	negative	negative	negative	Y	N	N	N	Y	N	N	N	N	N	N	N				N	N	N	N	N	N	b	b	c	N	0					latrine	Y	Y
SA 006	SA	12	F	69	9.28	19.4917	37.1111	112	40	-2	1.5	negative	negative				Y	Y	N	N	N	N	N	N	N	N	N	N			tap water	Y	Y	Y	N	N	N	b	b	b	Y	6	Y	b	N	b	other	N	N
SA 007	SA	36	F	85	10	13.8408	35.7222	88	24	-2.5	-1	negative	negative	negative	negative	negative	Y	N	N	Y	N	N	N	N	N	N	N	N			tap water	Y	N	N	N	N	N	g	g	g	Y	4	Y	g	N		suspended_latrine	N	N
SA 009	SA	48	F	110	12.7727	10.556	36.9444	70	20	1.5	<-3.0	negative	negative	negative	negative	negative	Y	N	N	N	Y	N	N	N	N	N	N	N				N	Y	Y	Y	N	N	c	c	e	Y	4	Y	c	N		latrine	Y	Y
SA 011	SA	18	M	78	8.1	13.3136	36	90	16	-1	-3	negative	negative	negative	negative	negative	N	Y	N	N	N	Y	N	N	N	Y	N	N				N	Y	N	Y	Y	N	c	c	b	Y	1	Y	c	N	c	compost_outhouse	Y	Y
SA 013	SA	24	F	84	10.1	14.3141	36.9444	88	16	-1	-2	negative	negative	negative	negative	negative	N	N	N	Y	N	Y	Y	N	N	N	N	N			tap water	Y	N	N	N	N	N	d	a	b	Y	1	Y	d	N	a	suspended_latrine	N	Y
SA 014	SA	6	M	82	6.26	9.30993	36.9444	120	30	>3.0	<-3.0	negative	negative				N	Y	N	N	N	N	N	N	N	N	N	N			tap water	Y	N	N	N	N	N	c	c	c	Y	1	Y	g	N	g	latrine	Y	Y
SA 015	SA	34	M	87	9.5	12.5512	37.3333	100	20	-2	-2	negative	negative				N	Y	N	N	N	N	N	N	N	N	N	N			tap water	Y	N	N	N	N	N	c	c	c	Y	1	Y	g	N	g	latrine	Y	Y
SA 016	SA	26	M	85	15.5	21.4533	37.2778	88	24	0	3	negative	negative	negative	negative	negative	Y	Y	N	N	Y	Y	N	Y	N	N	N	N				N	N	N	N	N	N	c	c	c	N	0					latrine	Y	Y
SA 017	SA	60	F	106	16.9	15.0409	37.3889	88	22	-1	0	negative	negative	negative	negative	negative	Y	N	N	N	Y	N	N	N	N	N	N	N			tap water	Y	N	N	N	N	N	g	g	b	Y	2	N		N		suspended_latrine	N	Y
SA 018	SA	48	F	103	15.8	14.893	36.6667	74	42	0	0	negative	negative	negative	negative	negative	N	N	N	N	Y	N	N	N	N	N	N	N			tap water	Y	N	N	N	N	N	g	a	g	N	0					suspended_latrine	N	Y
SA 019	SA	12	F	72	8	15.4321	36.1667	138	56	-1	-1	negative	negative	negative	negative	negative	N	N	N	N	Y	N	N	N	N	N	N	N			tap water	Y	Y	N	Y	Y	N	g	b	b	N	0					suspended_latrine	N	N
SA 020	SA	36	M	98	16.5	17.1803	36.1667	81	21	1	1	negative	negative	negative	negative	negative	Y	N	N	N	N	N	N	N	N	N	N	N			tap water	Y	N	N	N	N	N	d	a	c	Y	2	N	a	N	a	latrine	uncertain	N
SA 021	SA	60	M	109	18.3	15.4027	36.1667	90	16	0	0	negative	negative	negative	negative	negative	N	N	N	N	Y	N	N	N	N	N	N	N				N	N	N	N	N	N	b	a	b	Y	2	N	a	N	a	latrine	N	N
SA 025	SA	36	F	92	13.4	15.8318	36.8333	88	20	-1	0.5	positive	negative	positive	negative	negative	N	N	N	Y	N	Y	N	Y	N	N	N	N			tap water	Y	N	N	N	N	N	c	g	b	Y	3	N	g	N	g	suspended_latrine	N	Y
SA 026	SA	48	F		16.1		36.6667	88	16			positive	negative	negative	negative	negative	N	N	N	N	Y	N	N	N	N	N	N	N			tap water	Y	Y	N	Y	Y	N	b	a	b	Y	1	N		N		suspended_latrine	Y	Y
SA 027	SA	48	F	101	16.3	15.9788	36.5	91	20	-0.5	0.5	negative	negative	negative	negative	negative	N	N	N	N	Y	N	N	N	N	N	N	N			tap water	Y	N	N	N	N	N	g	a	b	N	0					suspended_latrine	N	N
SA 028	SA	36	F	89	11.6	14.6446	36.6667	100	20	-1.5	-0.5	negative	negative				Y	Y	N	N	N	Y	Y	N	N	N	N	N				N	Y	Y	N	N	N	e	a	c	N	0					suspended_latrine	Y	Y
SA 029	SA	24	F	85	10.6	14.6713		120	24	-0.5	-0.5	negative	negative				N	Y	N	N	N	Y	Y	N	N	N	N	N				N	Y	Y	N	N	N	e	a	c	N	0					suspended_latrine	Y	Y
SA 030	SA	24	F	85	12.3	17.0242	36.8889	120	20	-0.5	1	negative	negative	negative	negative	negative	N	N	N	N	Y	N	N	N	N	N	N	N			tap water	Y	N	N	N	N	N	c	g	g	Y	2	Y	g	Y	g	other	N	N
SA 033	SA	34	M	94	13.4	15.1652	37.3889	100	20	-0.5	-0.5	negative	negative	negative	negative	negative	N	N	N	Y	N	Y	N	N	N	N	N	Y				N	Y	N	N	Y	N	b	b	b	Y	1	N	g	N	g	suspended_latrine	Y	Y
SA 034	SA	36	M	94	13.9	15.7311	36.2778	88	20	-1	0.5	positive	negative				N	N	N	N	Y	N	N	N	N	N	N	N			tap water	Y	Y	N	Y	N	N	b	a	b	Y	1	Y	b	N	a	latrine	N	Y
SA 035	SA	36	M	90	13.1	16.1728	36.8333	120	20	-1.5	0.5	negative	negative	negative	negative	negative	N	N	N	N	Y	N	N	N	N	N	N	N			tap water	Y	Y	N	Y	N	N	b	a	b	Y	1	Y	b	N	a	latrine	N	Y
SA 037	SA	12	M	71	7.5	14.878	36.8333	90	24	-2	-1.5	negative	negative	negative	negative	negative	N	N	N	N	Y	N	N	N	N	N	N	N			tap water	Y	N	N	N	N	N	g	g	d	N	0					other	N	N
SA 038	SA	36	M	109	10.3182	8.68461	36.9444	72	16	3	>3.0	negative	negative				N	N	N	N	Y	N	N	N	N	N	N	N			tap water	Y	N	N	N	N	N	c	b	b	Y	1	Y	b	Y	b	other	N	Y
SA 039	SA	48	M	96	17.1	18.5547	37.0556	72	20	-2	2.5	negative	negative	negative	negative	negative	N	N	N	N	Y	N	N	N	N	N	N	N			tap water	Y	N	N	N	N	N	c	b	b	Y	1	Y	b	Y	b	other	N	Y
SA 040	SA	24	M	83	11.3	16.403	37.5	84	20	-1.5	0	negative	negative				Y	N	N	N	Y	N	N	N	N	N	N	N			tap water	Y	Y	Y	N	N	N	b	b	c	N	0					suspended_latrine	N	Y
SA 041	SA	36	F	92	15.9	18.7854	35.8333	80	20	-1	2.5	negative	negative	negative	negative	negative	N	N	N	Y	N	Y	Y	N	N	N	N	N			tap water	Y	Y	Y	N	N	N	d	b	c	Y	3	Y	d	Y	b	latrine	N	N
SA 042	SA	60	F	105	17.2	15.6009	36.1667	64	20	-1	0.5	negative	negative	negative	negative	negative	Y	N	N	Y	N	Y	Y	N	N	N	N	N			tap water	Y	Y	Y	N	N	N	d	b	c	Y	3	Y	d	Y	b	latrine	N	N
SA 043	SA	12	M	75	10	17.7778	36.6667	120	18	0	1	positive	negative	negative	negative	negative	Y	N	N	Y	N	Y	Y	N	N	N	N	N			tap water	Y	Y	Y	N	N	N	d	b	c	Y	3	Y	d	Y	b	latrine	N	N
SA 044	SA	3	M	51	5	19.2234	35.9444	120	24	<-3.0	2	negative	negative	negative	negative	negative	N	N	N	Y	N	N	N	N	N	N	N	N			tap water	Y	Y	N	N	Y	N	d	b	d	Y	1	Y	d	Y	d	suspended_latrine	N	Y
SA 045	SA	24	F				37.2					positive	negative	negative	negative	negative	Y	N	N	N	Y	N	N	N	N	N	N	N			tap water	Y	Y	Y	N	N	N	d	b	d	Y	1	Y	d	Y	d	suspended_latrine	N	Y
MF 040	SJ	36	F	136	13.9	7.51514	36.2778	74	28	>3.0	<-3.0	negative	negative	negative	negative	negative	N	N	N	Y	N	Y	Y	N	N	N	N	N			tap water	N	N	N	N	N	N	b	b	b	Y	1	Y	b	N	g	latrine	N	N
MF 041	SJ	12	F	96.52	10.5	11.2708	36	120	38	>3.0	<-3.0	negative	negative				N	N	N	Y	N	Y	Y	N	N	N	N	N				N	N	N	N	N	N	b	b	b	Y	2	N	g	N	g	latrine	N	N
MF 042	SJ	48	F	111.252	18.2	14.7047	35.8333	60	14	2	0	negative	negative	negative	negative	negative	Y	N	Y	N	N	Y	Y	N	N	N	N	N				N	Y	Y	N	Y	N	b	b	b	N	0					bucket_latrine	f	N
MF 043	SJ	48	M	90.17	19.5	23.9834	36.2222	63	12	-3	>3.0	positive	negative				N	N	N	Y	N	Y	N	Y	N	N	N	N				Y	Y	Y	N	N	N	c	a	b	Y	3	Y	b	Y	a	latrine	N	N
MF 044	SJ	48	M	99.06	16.3	16.6108	36.3889	62	15	-1	1	negative	negative	negative	negative	negative	N	N	N	Y	N	Y	Y	N	N	N	N	N				N	N	N	N	N	N	g	b	b	Y	1	Y	b	N	b	bucket_latrine	Y	N
MF 045	SJ	36	F	92.71	11.8	13.7287	36.3333	72	12	-2	-1	negative	negative	negative	negative	negative	N	N	Y	N	N	Y	Y	N	N	N	N	N				N	N	N	N	N	N	a	a	b	N	0					suspended_latrine	N	N
MF 046	SJ	48	F	98.425	15.1	15.5871	36.1111	140	48	-1	0.5	negative	negative				N	N	N	Y	N	Y	N	N	N	N	Y	N				N	Y	N	Y	N	N	b	b	b	Y	2	Y	b	N	g	suspended_latrine	Y	Y
MF 047	SJ	60	F	102.87	17.8	16.8206	36.3333	56	28	-1.5	1	negative	negative	negative	negative	negative	N	N	N	Y	N	Y	N	N	N	N	Y	N			tap water	Y	Y	N	Y	N	N	g	g	g	Y	2	N	g	N	g	latrine	Y	uncertain
MF 048	SJ	48	F	91.44	14.6	17.4615	34.8333	66	15	-2.5	1	negative	negative	negative	negative	negative	N	N	N	Y	N	Y	N	Y	N	N	N	N				N	Y	Y	N	N	N	b	a	b	Y	4	N	b	N	a	bucket_latrine	Y	N
MF 049	SJ	48	F	91.44	15.3	18.2986	36.2778	80	14	-2.5	2	negative	negative				N	N	Y	N	N	Y	Y	N	N	N	N	N				N	N	N	N	N	N	a	a	b	Y	4	N	g	N	g	suspended_latrine	N	N
MF 050	SJ	48	F	96.52	14.1	15.1351	36.3889	130	40	-1.5	0	negative	negative	negative	negative	negative	N	N	Y	N	N	Y	N	N	Y	N	N	N				N	Y	N	N	N	N	b	a	b	N	0					suspended_latrine	Y	N
MF 051	SJ	48	F	93.98	11.8	13.3601	36.4444	64	12	-2.5	-2	negative	negative				N	N	Y	N	N	Y	N	N	N	N	Y	N				Y	Y	N	N	Y	N	b	a	b	Y	1	Y	b	Y	b	suspended_latrine	N	N
MF 052	SJ	48	F	102.235	11.5	11.0027	36.3333	40	24	0	<-3.0	negative	negative				N	N	Y	N	N	Y	Y	N	N	N	N	N				N	N	N	N	N	N	b	c	b	Y	1	Y	b	N	a	suspended_latrine	N	N
MF 053	SJ	60	M	102.87	15.5	14.6472	36.3889	72	32	-1.5	0	negative	negative	negative	negative	negative	N	N	Y	N	N	Y	Y	N	N	N	N	N				Y	Y	Y	Y	N	N	b	b	b	Y	5	Y	b	Y	b	suspended_latrine	Y	N
MF 054	SJ	48	F	91.44	14.2	16.9831	36.2222	68	14	-3	1	negative	negative	negative	negative	negative	N	N	Y	N	N	Y	Y	N	N	N	N	N				N	N	N	N	N	N	b	b	b	Y	4	Y	b	N	a	suspended_latrine	Y	N
MF 055	SJ	60	M	92.71	13.5	15.7065	36.3889	68	15	<-3.0	0.5	negative	negative				N	N	Y	N	N	N	N	N	N	N	N	N			tap water	Y	N	N	N	N	N	a	a	a	Y	6	N	g	N	g	suspended_latrine	Y	N
MF 056	SJ	12	F	71.12	10.9091	21.5678	36.3889	60	20	<-3.0	3	negative	negative	negative	negative	negative	N	N	Y	N	N	Y	N	Y	N	N	N	N				N	N	N	N	N	N	b	g	b	Y	4	N	g	Y	b	latrine	N	N
MF 057	SJ	36	M	93.98	16.2	18.3419	36.2778	76	12	-0.5	2	negative	negative	negative	negative	negative	N	N	Y	N	N	Y	N	Y	N	N	N	N				N	N	N	N	N	N	b	g	b	Y	4	N	g	Y	b	latrine	N	N
MF 058	SJ	12	M	55.88	7.7	24.6591	35.8333	100	28	<-3.0	>3.0	negative	negative	negative	negative	negative	N	N	Y	N	N	Y	Y	N	N	N	N	N				N	N	N	N	Y	N	b	a	b	Y	2	N	b	N	a	suspended_latrine	N	N
MF 059	SJ	36	F	80.01	11	17.1832	36.3889	64	40	<-3.0	1	positive	negative	negative	negative	negative	Y	N	Y	N	N	Y	Y	N	N	N	N	N				N	N	N	N	N	N	b	a	b	Y	4	N	a	N	a	suspended_latrine	Y	N
MF 059	SJ	36	F	80.01	11	17.1832	36.3889	64	40	<-3.0	1	negative	negative	negative	negative	negative	Y	N	Y	N	N	Y	Y	N	N	N	N	N				N	N	N	N	N	N	b	a	b	Y	4	N	a	N	a	suspended_latrine	Y	N
MF 060	SJ	36	M	90.17	11.7	14.39	36.2778	80	14	-1.5	-1	negative	positive	negative	negative	negative	Y	N	N	Y	N	Y	N	Y	N	N	N	N				Y	Y	Y	N	Y	N	b	a	b	Y	3	Y	b	Y	b	latrine	Y	N
MF 061	SJ	24	F	81.28	10.9	16.4991	36.2222	160	15	-1.5	0.5	negative	negative				N	N	N	Y	N	Y	N	Y	N	N	N	N				N	N	N	N	N	N	b	b	b	Y	3	Y	b	Y	b	latrine	N	N
MF 062	SJ	57	M	104.14	16	14.7532	36.4444	64	14	-1	-0.5	positive	negative	negative	negative	negative	Y	N	N	Y	N	Y	N	Y	N	N	N	N				N	Y	N	N	Y	N	a	a	d	Y	3	Y	d	Y	d	latrine	N	N
MF 063	SJ	48	F	95.25	13.6	14.9903	36.4444	80	32	-2	0	negative	negative	negative	negative	negative	N	N	N	Y	N	Y	N	Y	N	N	N	N				N	N	N	N	N	N	b	a	a	Y	2	N	a	N	a	latrine	N	N
MF 064	SJ	48	M	99.06	16	16.3051	36.2778	80	36	-1	0.5	negative	negative	negative	negative	negative	Y	N	N	Y	N	Y	Y	N	N	N	N	N				N	Y	N	Y	Y	N	b	b	a	N	0					bucket_latrine	Y	N
MF 065	SJ	51	M	100.33	16.6	16.491	36.4444	70	16	-1	0.5	negative	negative				Y	N	N	Y	N	Y	N	N	N	N	N	N		Y		Y	N	N	N	N	N	b	g	b	Y	2	Y	b	N	b	latrine	Y	N
MF 066	SJ	48	M	97.79	15	15.6856	36.3333	84	24	-1	0.5	negative	negative	negative	negative	negative	N	N	N	Y	N	Y	Y	N	N	N	N	N				N	N	N	N	N	N	b	b	b	Y	3	N	b	Y	b	bucket_latrine	Y	Y
MF 067	SJ	36	M	92.71	12.4	14.4268	36.4444	120	32	-1	-1	negative	negative	negative	negative	negative	N	N	N	Y	N	Y	N	Y	N	N	N	N				Y	Y	Y	N	N	N	b	a	b	N	0					bucket_latrine	Y	Y
MF 068	SJ	58	M	93.98	17.3	19.5873	36.3889	72	16	<-3.0	3	negative	negative	negative	negative	negative	N	N	Y	N	N	Y	N	Y	N	N	N	N				N	N	N	N	N	N	b	g	b	Y	4	N	g	N	b	latrine	N	N
MF 069	SJ	36	M	96.52	15.6	16.7452	36.7778	80	14	0	1	negative	negative	negative	negative	negative	N	N	Y	N	N	Y	Y	N	N	N	N	N				N	Y	N	N	Y	N	b	a	b	Y	1	N	b	N	a	latrine	Y	Y
MF 070	SJ	48	M	102.87	16.4	15.4977	36.4444	76	24	0	0	negative	negative	negative	negative	negative	Y	N	N	N	Y	Y	N	N	N	Y	N	N				N	N	N	N	N	N	a	b	b	Y	9	Y	b	N	a	latrine	N	N
MF 071	SJ	48	F	93.98	15.4	17.4361	36.3333	72	16	-2	1	negative	negative				N	N	N	Y	N	Y	Y	N	N	N	N	N				N	N	N	N	N	N	a	a	b	Y	2	Y	c	N	a	latrine	N	N
MF 072	SJ	48	F	96.52	16.2	17.3892	37.1111	64	12	-1.5	1	negative	negative	negative	negative	negative	N	N	N	N	Y	Y	N	N	N	Y	N	N				N	Y	N	N	Y	N	b	a	b	Y	6	Y	b	N	a	latrine	N	N
MF 073	SJ	24	F	91.44	13.2	15.7871	36.5556	64	14	1.5	0.5	negative	negative				N	N	N	N	Y	Y	N	N	N	Y	N	N				Y	Y	N	N	Y	N	b	a	b	Y	6	Y	b	N	b	latrine	N	N
MF 074	SJ	48	F	91.44	15.2	18.179	36.8333	68	14	-3	2	positive	negative				N	N	Y	N	N	Y	Y	N	N	N	N	N				N	N	N	N	N	N	b	b	b	Y	2	Y	e	Y	e	latrine	N	N
MF 075	SJ	48	F	95.25	13.5	14.88	36.2778	76	14	-3	0	negative	negative	negative	negative	negative	N	N	Y	N	N	Y	N	N	N	N	Y	N				Y	N	N	N	N	N	a	a	a	Y	2	N	a	N	a	latrine	Y	N
MF 076	SJ	59	F	99.695	14.8	14.8907	36.3333	88	16	-2	0	negative	negative				N	N	N	N	Y	Y	N	N	N	Y	N	N				Y	N	N	N	N	N	a	a	b	Y	2	Y	a	N	a	latrine	Y	N
MF 077	SJ	35	M	85.5	11.2	15.321	36.5	100	60	-3	0	negative	negative	negative	negative	negative	N	N	N	Y	N	Y	Y	N	N	N	N	N				Y	N	N	N	N	N	b	a	b	Y	1	N	a	N	a	bucket_latrine	N	N
MF 078	SJ	8	M	68	10.9091	23.5923		100	16	0	>3.0	negative	negative				N	N	Y	N	N	N	N	N	N	N	N	N			tap water	Y	N	N	N	N	N	e	a	c	Y	6	N	g	N	g	bucket_latrine	N	N
MF 079	SJ	2	F	54	8	27.4348	36.6667	120	30	-2	>3.0	negative	negative				N	N	Y	N	N	Y	N	N	N	Y	N	N				N	N	N	N	N	N	a	a	a	Y	8	N	a	N	a	latrine	N	N
MF 086	SJ	9	M	69	8	16.8032	36.2778	62	12	0	0	negative	negative	negative	negative	negative	N	N	Y	N	N	Y	N	N	N	Y	N	N				N	N	N	N	N	N	d	a	c	Y	5	N	a	N	a	latrine	N	N
MF 087	SJ	48	M	90.17	13	15.9889	36.3333	60	15	-3	0.5	negative	negative	negative	negative	negative	N	N	Y	N	N	Y	N	N	N	Y	N	N				Y	N	N	N	N	N	a	a	a	Y	5	N	a	N	a	latrine	N	N
MF 088	SJ	36	F	88.9	13.4	16.9551	36.4444	64	24	-1.5	1	negative	negative				N	N	Y	N	N	Y	Y	N	N	N	N	N				N	Y	Y	N	N	N	b	a	a	Y	2	Y	g	N	g	latrine	Y	N
MF 089	SJ	48	F	107.95	18.8	16.1329	36.1111	64	15	1	0.5	negative	negative	negative	negative	negative	N	N	N	Y	N	Y	N	N	N	N	N	N		Y		Y	Y	Y	N	Y	N	a	b	a	Y	4	N	a	N	a	latrine	N	N
MF 090	SJ	16	F	70	5.90909	12.0594	36.3889	56	32	-3	-3	negative	negative	negative	negative	negative	N	N	Y	N	N	Y	Y	N	N	N	N	N				N	Y	Y	N	N	N	a	a	b	Y	7	N	g	N	a	suspended_latrine	N	N
MF 090	SJ	36	F	92.71	14.8	17.219	36.1667	112	32	-1	1	negative	negative				N	N	N	Y	N	Y	N	Y	N	N	N	N			tap water	Y	Y	Y	N	N	N	c	a	b	Y	2	N	b	N	a	bucket_latrine	N	N
MF 091	SJ	48	M	98.425	14.1	14.5549	36.6667	94	5	-1	0	negative	negative				N	N	Y	N	N	Y	Y	N	N	N	N	N				N	Y	N	N	Y	N	g	g	b	Y	7	N	g	N	a	suspended_latrine	N	N
MF 092	SJ	48	F	100.33	14.5	14.4048	35.9444	64	14	-1	-1	negative	negative				N	N	Y	N	N	Y	N	N	N	N	Y	N			tap water	Y	N	N	N	N	N	b	b	b	N	0					suspended_latrine	Y	N
MF 093	SJ	48	F	93.345	11.8	13.5425	36.6667	64	14	-2.5	-1	negative	negative				Y	N	Y	N	N	Y	N	Y	N	N	N	N				N	Y	Y	N	N	N	b	a	b	Y	4	Y	b	Y	b	latrine	N	Y
MF 094	SJ	48	F	100.33	16.7	16.5903	36.4444	100	40	-1	1	negative	negative				Y	N	N	Y	N	Y	N	Y	N	N	N	N				Y	Y	Y	N	N	N	a	a	d	Y	2	N	b	N	a	bucket_latrine	N	N
MF 097	SJ	43	M	93.98	13.9	15.7378	36.2778	72	14	-2	0.5	negative	negative	negative	negative	negative	N	N	N	Y	N	Y	Y	N	N	N	N	N				Y	Y	Y	N	N	N	c	a	d	Y	2	Y	d	N	g	bucket_latrine	Y	N
MF 098	SJ	48	F	95.885	13.6	14.7924	36.4444	82	24	-2	0	positive	negative	negative	negative	negative	N	N	Y	N	N	Y	N	Y	N	N	N	N				Y	N	N	N	N	N	a	a	b	Y	4	N	a	N	a	latrine	N	N
MF 099	SJ	36	M	87.63	12.7	16.5386	36.2778	92	20	-2	1	negative	negative	negative	negative	negative	N	N	Y	N	N	Y	N	N	N	N	Y	N			tap water	Y	N	N	N	N	N	b	a	b	Y	4	N	a	N	g	suspended_latrine	Y	N
MF 100	SJ	24	M	80.01	10.9	17.027	36	100	60	-2	1	negative	negative				N	N	Y	N	N	Y	N	N	N	N	Y	N			tap water	Y	Y	Y	N	N	N	b	b	b	Y	3	N	a	N	a	latrine	N	N
MF 101	SJ	48	M	88.265	10.9	13.991	36.7778	120	32	-3	-1	negative	negative	negative	negative	negative	N	N	N	Y	N	Y	Y	N	N	N	N	N				Y	N	N	N	N	N	d	a	f	Y	2	Y	f	Y	f	bucket_latrine	N	Y
MF 102	SJ	59	F	83.82	11.5	16.3683	36.2778	60	15	<-3.0	0.5	negative	negative				N	N	Y	N	N	Y	N	Y	N	N	N	N				Y	N	N	N	N	N	b	b	b	Y	4	Y	g	Y	g	latrine	Y	Y
MF 103	SJ	14	M	70	10.4545	21.3358	36.3889	56	28	-3	3	negative	negative				Y	N	N	Y	N	Y	Y	N	N	N	N	N			tap water	Y	N	N	N	N	N	b	a	b	Y	3	N	b	N	a	other	N	N
MF 104	SJ	36	F	90.17	11.5	14.144	37.2222	84	22	-1	-1	negative	negative	negative	negative	negative	N	N	Y	N	N	Y	N	N	N	N	Y	N				N	Y	Y	N	N	N	a	a	a	N	0					suspended_latrine	Y	N
MF 105	SJ	36	F	92.71	12.5	14.5431	36.8889	160	32	-0.5	0	negative	negative	negative	negative	negative	N	N	N	Y	N	Y	N	N	N	N	Y	N				Y	N	N	N	N	N	b	b	b	Y	4	N	b	N	g	latrine	Y	N
MF 106	SJ	48	M	99.06	16.4	16.7127	36.2778	64	15	-1	1	positive	negative				N	N	N	Y	N	Y	N	Y	N	N	N	N				Y	Y	Y	N	N	N	a	a	c	Y	2	N	a	N	a	bucket_latrine	N	Y
MF 107	SJ	48	M	101.6	16.5	15.9844	37.1111	72	16	0	0.5	negative	negative				N	N	Y	N	N	Y	N	N	N	N	Y	N				Y	N	Y	N	N	N	b	a	b	Y	3	N	a	N	g	suspended_latrine	N	N
MF 108	SJ	16	M	63.5	8.63636	21.4182	36.3889	100	60	-3	3	negative	negative	negative	negative	negative	Y	N	Y	N	N	Y	N	N	N	N	Y	N				N	N	N	N	N	N	b	a	a	Y	2	N	a	N	g	suspended_latrine	Y	N
MF 109	SJ	48	F	88.9	13.1	16.5755	36.5	68	12	-3	1	negative	negative	negative	negative	negative	N	N	Y	N	N	Y	N	N	N	N	Y	N				N	N	N	N	N	N	b	b	b	Y	4	N	g	N	g	latrine	Y	N
MF 110	SJ	48	M	86.36	12	16.09	35.8333	64	16	<-3.0	0.5	negative	negative				Y	N	N	Y	Y	N	N	N	N	N	N	N			tap water	Y	N	N	N	N	N	b	a	a	Y	4	N	a	N	c	latrine	Y	N
MF 111	SJ	23	F	77	11.5	19.3962	36.6111	56	28	-2.5	2.5	negative	negative				N	N	Y	N	N	Y	Y	N	N	N	N	N				N	Y	Y	N	N	Y	b	a	a	N	0					suspended_latrine	Y	N
MF 112	SJ	48	F	93.98	15.3	17.3229	36.5	72	14	-2	1	negative	negative				N	N	Y	N	N	Y	N	N	N	N	Y	N			tap water	Y	N	N	N	N	N	b	b	b	Y	3	N	a	N	a	latrine	Y	Y
MF 113	SJ	36	M	86.36	11.8	15.8218	36.2778	64	14	-3	0.5	negative	negative				N	N	Y	N	N	Y	N	N	N	N	Y	N				N	Y	Y	N	N	N	b	b	b	Y	3	Y	b	Y	b	suspended_latrine	Y	N
MF 114	SJ	36	F	93.98	13.7	15.5114	36.8889	76	20	-0.5	0.5	negative	negative	negative	negative	negative	N	N	N	Y	N	Y	N	N	N	N	N	Y				Y	N	N	N	N	N	b	b	b	N	0					latrine	N	N
MF 115	SJ	48	F	97.79	15.9	16.6268	35.9444	154	32	-1	1	negative	negative				Y	N	Y	N	N	Y	Y	N	N	N	N	N				N	Y	N	N	Y	N	b	a	b	Y	2	N	a	N	b	suspended_latrine	N	N
MF 116	SJ	9	F	60	7	19.4444	36.3333	60	14	<-3.0	1.5	negative	negative				N	N	N	Y	N	Y	Y	N	N	N	N	N			tap water	Y	Y	Y	N	Y	N	b	c	c	N	0					latrine	Y	N
MF 117	SJ	10	M	61	8.3	22.3058	36.5556	120	20	<-3.0	3	negative	negative				N	N	Y	N	N	Y	N	N	N	N	Y	N				N	Y	Y	N	N	N	b	a	b	N	0					latrine	Y	N
MF 118	SJ	24	M	83.82	11.3	16.0836	36.5	100	28	-1	0	negative	negative	negative	negative	negative	N	N	Y	N	N	Y	N	N	N	N	Y	N				Y	N	N	N	N	N	a	a	a	Y	7	Y	b	Y	b	latrine	N	N
MF 119	SJ	52	M	93.98	14	15.851	36.6111	72	60	-3	0.5	positive	negative				N	N	N	Y	N	Y	N	N	N	N	N	N		Y	tap water	N	N	N	N	N	N	a	a	b	Y	1	N	a	N	a	latrine	Y	N
MF 120	SJ	4	F	54	6.36364	21.8232	36.7222	60	40	<-3.0	3	negative	negative				N	N	Y	N	N	Y	N	Y	N	N	N	N				N	N	N	N	N	N	a	a	a	Y	1	N	a	N	b	latrine	N	N
SL1	SL	60	F	108	19.5	16.7181	36.5	64	18	-0.5	1	negative	negative				N	N	Y	Y	Y	Y	Y	N	N	N	N	N				N	N	N	N	N	N	e	b	b	Y	2	N	a	N	a	latrine	N	N
SL2	SL	72	F	106	15.9	14.1509	36.5	100		-2	-1	negative	negative				N	Y	N	N	N	Y	Y	N	Y	Y	N	N				N	N	N	N	N	N	b	b	b	N	0					suspended_latrine	N	N
SL3	SL	36	F	87	13.7	18.1001	36.2778	17	63	-2	2	negative	negative				N	Y	N	N	N	Y	Y	N	N	N	N	N	Y			N	Y	Y	N	Y	N	c	a	b	Y	3	N	b	N	a	latrine	Y	N
SL4	SL	36	M	84	11.4	16.1565	36.1667	114	18	<-3.0	0	positive	negative				N	Y	N	Y	N	Y	N	N	N	N	N	N	Y			N	Y	Y	N	Y	N	b	a	b	Y	2	N	a	Y	b	other	N	Y
SL5	SL	48	M	89	12.2	15.4021	36.3889	100	24	-3	0	negative	negative				N	Y	N	Y	N	Y	N	N	N	N	N	N	Y			N	N	N	N	N	N	d	a	b	N	0					latrine	Y	N
SL6	SL	8	M	64	9	21.9727	38.9	120	20	-3	3	negative	negative				N	Y	N	Y	N	Y	N	N	N	N	N	N				N	N	N	N	N	N	b	a	b	Y	2	N	b	Y	b	latrine	N	Y
SL7	SL	48	M	102	15.5	14.8981	36.3333	63	18	-0.5	0	negative	negative				N	Y	N	Y	N	Y	N	Y	N	N	N	N				N	N	N	N	N	N	b	b	b	Y	2	N	b	Y	b	latrine	N	Y
SL9	SL	60	M	109	23.9	20.1162		60	20	0	3	negative	negative				N	Y	N	Y	N	Y	N	N	N	N	N	N	Y			N	Y	Y	N	N	N	b	a	b	N	0					suspended_latrine	Y	Y
SL10	SL	60	F	106	18.6	16.5539	35.6111	103	18	-1	1	positive	negative				N	Y	N	Y	N	Y	Y	N	N	N	N	N	Y			N	Y	N	N	Y	N	d	d	d	Y	1	Y	b	N	b	suspended_latrine	N	Y
SL12	SL	60	F	97	15.9	16.8987	36.0556	106	18	-2.5	1	positive	negative				N	N	N	N	Y	N	N	N	N	N	N	N				N	Y	Y	N	N	N	b	a	a	Y	5	N	a	N	a	latrine	N	N
SL13	SL	60	M	90	13	16.0494	36.1111	80	32	<-3.0	1	negative	negative				Y	Y	N	Y	N	Y	N	N	N	Y	N	N				Y	Y	Y	N	N	N	b	a	b	Y	3	N	a	Y	b	latrine	Y	uncertain
SL15	SL	36	M	80	9.9	15.4687	35.9444	100	40	<-3.0	0	negative	negative				N	Y	N	Y	N	Y	N	N	N	Y	N	N				N	N	N	N	N	N	b	a	d	Y	4	N	a	N	a	latrine	N	Y
SL17	SL	48	F	89	12.4	15.6546	36.2778	108	18	-3	0.5	positive	negative				N	Y	N	Y	N	Y	N	N	N	Y	N	N				Y	N	N	N	N	N	b	a	b	Y	2	Y	b	N	a	latrine	N	N
SL18	SL	24	F	78	10	16.4366	36.2778	110	18	-2.5	0.5	positive	negative				N	Y	N	Y	N	Y	N	N	N	Y	N	N				Y	N	N	N	N	N	b	a	b	Y	2	Y	b	N	a	latrine	N	N
SL19	SL	60	M	97	13.9	14.7731		68	28	-2.5	0	negative	negative				N	Y	N	Y	N	Y	N	N	N	Y	N	N				Y	Y	N	N	Y	N	b	b	b	N	0					latrine	Y	Y
SL20	SL	48	F	91	17.3	20.8912	36.5556	20	22	-3	3	negative	negative				N	Y	N	Y	N	Y	Y	N	N	N	N	N			tap water	Y	Y	N	N	Y	N	a	a	b	Y	4	Y	b	N	a	latrine	Y	Y
SL21	SL	24	M	77	9.1	15.3483	36.1111	120	20	-3	-1	negative	negative				N	N	N	N	Y	N	N	N	N	N	N	N				N	N	N	N	N	N	b	b	b	N	0					unsure	Y	N
SL22	SL	60	F	105	16.8	15.2381	36.7222	68	32	-1	0	negative	negative				Y	Y	N	Y	N	Y	N	N	N	Y	N	N				Y	N	N	N	N	N	c	b	c	Y	4	N	g	N	a	latrine	Y	N
SL23	SL	12	M	72	8.6	16.5895	35.2222	100	28	-2	0	negative	negative				N	Y	N	Y	N	Y	N	N	N	Y	N	N				chlorinated	N	N	N	N	N	a	a	a	N	0					latrine	Y	N
SL24	SL	16	F	71	6.7	13.291	37.2222	96	18	-2.5	-2.5	negative	positive				N	Y	N	Y	N	Y	N	N	N	Y	N	N				chlorinated	Y	Y	Y	Y	N	b	b	b	N	0					latrine	Y	N
SL25	SL	60	M	93	13.08	15.1231	36.1111	100	24	<-3.0	0	negative	negative				N	Y	N	Y	N	Y	N	N	N	Y	N	N				chlorinated	N	N	N	N	N	b	a	c	Y	2	Y	c	N	a	latrine	Y	N
SL26	SL	36	M	82	11.8	17.5491	36.0556	99	20	<-3.0	2	negative	negative				N	Y	N	Y	N	Y	N	N	N	Y	N	N				chlorinated	Y	Y	N	Y	N	b	g	c	Y	8	N	a	N	a	toilet	Y	N
SL27	SL	11	M	64	7.9	19.2871	35.3333	102	21	<-3.0	2	negative	negative				N	Y	N	Y	N	Y	N	N	N	N	N	N		Y	tap water	chlorinated	N	N	N	N	N	b	b	b	N	0					toilet	Y	N
SL28	SL	36	F	88.9	8.18182	10.3525	36.8	94	28	-1.5	<-3.0	negative	negative	negative	negative	negative	N	Y	N	Y	N	Y	N	N	N	Y	N	N				Y	Y	N	N	Y	N	c	b	b	Y	1	Y	c	Y	b	latrine	Y	N
SL29	SL	9	M	65	7.72727	18.2894	36.3	120	38	-3	1	negative	negative				N	Y	N	Y	N	Y	N	N	N	Y	N	N				chlorinated	Y	N	N	Y	N	c	b	b	Y	1	N	a	Y	a	latrine	Y	N
SL30	SL	36	M	91.44	13.1818	15.7653	36.5	84	12	-2	0.5	negative	negative	negative	negative	negative	N	Y	N	Y	N	Y	N	N	N	Y	N	N			tap water	Y	Y	Y	N	N	N	c	c	c	Y	1	Y	b	N	b	latrine	Y	N
SL31	SL	24	M	73.66	10	18.4305	37.5	84	12	<-3.0	1.5	negative	negative	negative	negative	negative	N	Y	N	Y	N	Y	N	N	N	Y	N	N			tap water	Y	Y	Y	N	N	N	c	b	b	Y	1	Y	c	N	b	latrine	Y	N
SL32	SL	36	M	88.9	11.8182	14.9536	37	84	16	-2	-0.5	negative	negative	negative	negative	negative	N	Y	N	Y	N	Y	N	N	N	Y	N	N				chlorinated	N	N	N	N	N	b	a	b	Y	5	N	a	N	a	latrine	N	N
SL33	SL	60	M	93.98	16.3636	18.5272	36.6	103	28	-3	2.5	positive	negative				N	Y	N	Y	Y	N	N	N	N	N	N	N			tap water	Y	Y	Y	N	Y	N	b	b	b	Y	5	N	b	N	a	latrine	N	N
SL34	SL	48	M	99.06	15.4545	15.7492	36.5	75	28	-1	0.5	negative	negative				N	Y	N	Y	N	Y	Y	N	N	N	N	N			tap water	Y	Y	Y	N	Y	N	b	a	c	N	0					toilet	Y	N
SL35	SL	24	M	78	11.8182	19.425	36.5	76	16	-3	2	negative	negative				N	Y	N	Y	N	Y	Y	N	N	N	N	N			tap water	Y	Y	Y	N	Y	N	b	a	b	Y	8	N	a	N	a	toilet	N	N
SL37	SL	9	F	67	7.72727	17.2138	36.5	115	40	-1	0	negative	negative	negative	negative	negative	N	Y	N	Y	N	Y	Y	N	N	N	N	N			tap water	Y	Y	Y	Y	N	N	b	b	c	N	0					toilet	uncertain	N
SL38	SL	48	M	99.06	15.4545	15.7492	37	95	28	-1	0.5	negative	negative				N	Y	N	Y	N	Y	N	N	N	N	N	Y			tap water	Y	N	N	N	N	N	a	b	b	N	0					toilet	N	N
SL41	SL	43	M	97.79	15	15.6856	37.3	68	12	0.5	0.5	negative	negative	negative	negative	negative	N	Y	N	Y	N	Y	N	N	N	N	N	N		Y		Y	Y	N	N	Y	N	b	b	b	Y	2	Y	b	Y	b	latrine	Y	Y
SL42	SL	17	M	79	10.3636	16.6057	36.7	115	30	-1	1	negative	negative	negative	negative	negative	N	Y	N	Y	N	Y	N	N	N	N	N	N		Y		Y	Y	N	N	Y	N	a	a	b	Y	2	Y	b	N	a	latrine	Y	Y
SL43	SL	16	F	74.93	9.54545	17.0014	37	80	12	-1	1	negative	negative				N	Y	N	Y	N	Y	N	N	N	Y	N	N				Y	Y	Y	N	N	N	a	a	b	Y	7	N	a	N	a	latrine	N	N
SL44	SL	36	F	86.36	12.7273	17.0651	36.9	115	28	-2.5	1	negative	negative				N	Y	N	Y	N	Y	N	N	N	Y	N	N				Y	Y	N	N	Y	N	b	b	b	Y	2	N	a	N	a	latrine	N	Y
SL45	SL	54	M	101.6	16.8	16.275	36.9	93	28	-1	0.5	negative	negative				N	Y	N	Y	N	Y	N	Y	N	N	N	N			tap water	Y	Y	Y	N	Y	N	b	b	d	N	0					latrine	Y	Y
SL46	SL	12	F	65	7.27273	17.2136	36.4	120	32	-3	0.5	negative	positive	negative	negative	negative	N	N	N	N	Y	Y	Y	N	N	N	N	N			tap water	Y	Y	N	Y	Y	N	a	a	b	N	0					latrine	Y	Y
SL47	SL	29	M	81.28	16.8182	25.4573	37.5		12	0	>3.0	negative	negative	negative	negative	negative	N	Y	N	N	N	Y	N	Y	N	N	N	N				Y	N	N	N	N	N	d	a	b	Y	1	Y	d	N	a	latrine	N	N
SL48	SL	60	M	104.14	18.6364	17.1841	37.5		32	-1	1	negative	negative	negative	negative	negative	N	Y	N	N	N	Y	Y	N	N	N	N	N			tap water	Y	N	N	N	N	N	b	b	b	Y	2	Y	b	Y	b	latrine	N	N
SL49	SL	15	F	74	9.54545	17.4314	36.5	115	30	-1.5	1	negative	negative				N	Y	N	N	N	Y	N	Y	N	N	N	N				Y	N	N	N	N	N	a	b	b	Y	2	N	a	N	a	latrine	N	Y
SL50	SL	21	F	83.82	13.6364	19.409	37.2	88	12	0	2	negative	negative	negative	negative	negative	N	Y	N	Y	N	Y	N	N	N	N	N	N	Y			N	N	Y	N	Y	N	b	d	a	Y	1	N	b	N	b	latrine	N	N
SL51	SL	57	F	104.14	16.3636	15.0885	37.1	100	28	-1	0	negative	negative	negative	negative	negative	N	N	Y	N	Y	Y	N	N	N	N	N	N				N	N	N	N	N	N	b	b	b	Y	1	Y	b	Y	b	latrine	Y	N
SL52	SL	49	F	99.06	16.8182	17.1389	36.7	68	20	-1	1	positive	negative	positive	negative	negative	N	N	N	N	Y	Y	Y	N	N	N	N	N				N	N	N	N	N	N	b	b	b	Y	1	N	g	N	a	latrine	Y	Y
SL53	SL	44	F	91.44	11.8182	14.1344	37	100	30	-2.5	-1	positive	negative	positive	negative	negative	N	Y	N	Y	N	Y	Y	N	N	N	N	N	Y			N	N	Y	N	N	N	c	a	b	Y	1	N	a	N	a	latrine	N	N
SL54	SL	26	M	72	8.18182	15.7828	36.6	110	20	<-3.0	0	negative	negative				N	Y	N	N	N	Y	Y	N	Y	Y	N	N				N	Y	Y	N	Y	N	b	a	b	N	0					latrine	Y	N
SL55	SL	25	M	78	10	16.4366	36.6	96	36	-2.5	0	negative	negative	negative	negative	negative	N	Y	N	Y	N	Y	N	N	N	N	N	N	Y			N	Y	Y	N	Y	N	b	b	b	Y	1	N	a	N	a	latrine	N	N
SL56	SL	42	F	88.9	16.3636	20.7051	37	100	28	-2.5	3	negative	negative				N	N	N	N	Y	N	N	N	N	N	N	N				Y	N	N	N	N	N	b	a	b	Y	1	N	a	Y	b	toilet	N	N
SL57	SL	65	F	78	7.72727	12.701	37.1	110	32	<-3.0	-1	negative	negative				Y	N	N	Y	N	Y	N	N	N	N	N	Y			tap water	Y	Y	N	N	Y	N	b	b	b	N	0					latrine	Y	N
SL58	SL	45	M	66.04	12.7273	29.1824	36.8	72	28	<-3.0	>3.0	negative	negative				N	N	N	N	Y	N	N	N	N	N	N	N			tap water	Y	Y	N	N	Y	N	b	a	b	Y	1	Y	b	N	a	toilet	N	N
SL59	SL	46	M	93.98	13.6364	15.4393	37	95	34	-2	0	negative	negative	negative	negative	negative	N	N	N	N	Y	N	N	N	N	N	N	N			tap water	Y	Y	N	Y	Y	Y	b	b	b	Y	1	Y	b	Y	b	latrine	Y	N
SL67	SL	48	M	93.98	14.5455	16.4686	36.7	105	32	-2.5	0.5	negative	negative				Y	N	N	Y	N	Y	Y	N	N	N	N	N			tap water	Y	N	N	N	N	N	b	b	b	N	0					latrine	N	N
SL68	SL	48	M	109.22	19.0909	16.0038	36.7	64	16	0	0.5	negative	negative				Y	N	N	N	Y	Y	Y	N	N	N	N	N			tap water	Y	Y	N	N	Y	N	a	b	b	Y	2	Y	b	Y	b	latrine	N	N
SL69	SL	24	M	72	10.4545	20.1669	36.5	96	20	<-3.0	3	negative	negative	negative	negative	negative	N	N	N	Y	N	Y	N	Y	N	N	N	N				Y	N	N	N	N	N	b	b	b	Y	2	N	a	N	a	latrine	N	N
SL70	SL	48	M	90	18.1818	22.4467	36.8	72	16	-3	>3.0	negative	negative				Y	N	N	N	Y	Y	Y	N	N	N	N	N			tap water	Y	Y	Y	Y	Y	N	b	b	b	N	0					latrine	Y	Y
SL71	SL	24	F	76	11.3636	19.6739	36.8	110	36	-3	2	negative	negative	negative	negative	negative	N	N	N	Y	N	Y	Y	N	N	N	N	N			tap water	Y	N	N	N	N	N	b	b	b	Y	1	Y	b	Y	b	latrine	Y	Y
SL72	SL	13	M	78	10.9091	17.9308	36.8	87	28	2	2	negative	negative	negative	negative	negative	N	N	N	N	Y	Y	N	Y	N	N	N	N			tap water	Y	Y	Y	N	N	N	d	b	b	Y	2	Y	b	N	a	latrine	N	N
SL73	SL	19	M	72	10.2273	19.7285	36.4	110	24	<-3.0	3	negative	negative				Y	N	N	N	Y	Y	N	Y	N	N	N	N			tap water	Y	Y	Y	N	N	N	b	b	b	Y	2	Y	b	N	a	latrine	N	N
SL74	SL	48	F	98.552	15.9091	16.38	37	72	20	-1	0.5	negative	negative	negative	negative	negative	N	N	N	N	Y	N	N	N	N	N	N	N			tap water	Y	Y	N	Y	Y	N	b	a	a	Y	2	Y	b	N	a	latrine	N	N
SL77	SL	48	M	101.6	15.9091	15.412	37	64	18	-0.5	0	negative	negative	negative	negative	negative	N	N	N	N	Y	N	N	N	N	N	N	N			tap water	Y	N	N	N	N	N	b	b	d	Y	1	Y	b	N	b	latrine	N	N
SL78	SL	48	M	91.44	13.6364	16.309	36.4	88	16	-3	0.5	negative	negative	negative	negative	negative	N	Y	N	N	Y	Y	Y	N	N	N	N	N				Y	N	N	N	N	N	b	b	b	Y	1	N	a	Y	a	latrine	N	N
SL79	SL	30	F	88.9	13.1818	16.6791	37.3	80	16	0	1	negative	negative				N	N	N	N	Y	N	N	N	N	N	N	N				Y	Y	N	N	N	Y	b	b	b	Y	1	Y	b	Y	b	latrine	Y	N
SL80	SL	8	F	62	7.27273	18.9197	36.9	120	20	-3	1.5	negative	negative				N	Y	N	N	N	Y	N	N	N	Y	N	N				N	N	N	N	N	N	b	b	b	N	0					latrine	Y	Y
SL81	SL	45	F	92.71	14.0909	16.394	36.7	100	32	-2	0.5	negative	negative				N	N	N	N	Y	Y	Y	N	N	N	N	N				Y	N	N	N	N	N	a	b	b	Y	3	Y	b	N	b	latrine	Y	Y
SL82	SL	12	F	76	10.8182	18.7295	36.5	110	35	0	1.5	negative	negative				N	N	N	N	Y	N	N	N	N	N	N	N				N	N	N	N	N	N	b	g	b	N	0					suspended_latrine	N	N
SL83	SL	48	F	102.87	16.6818	15.764	36.7	76	20	0	0.5	negative	negative	negative	negative	negative	N	N	N	N	Y	N	N	N	N	N	N	N				N	Y	Y	Y	Y	N	b	a	b	N	0					latrine	Y	N
SL84	SL	19	F	82.55	12.2727	18.0097	36.9	88	30	0	1.5	negative	negative				N	N	N	Y	Y	Y	Y	N	N	N	N	N				Y	N	N	N	N	N	a	a	c	Y	2	N	b	N	a	suspended_latrine	N	N
SLT 070	SL	24	F	86.36	10.9091	14.6273	37.1	100	32	0	-0.5	negative	negative	negative	negative	negative	N	N	N	N	Y	N	N	N	N	N	N	N			tap water	Y	N	N	N	N	N	b	b	b	Y	1	Y	b	N	a	latrine	N	N
SLT 071	SL	30	M	86.36	12.7273	17.0651	36.5	96	24	-0.5	1	negative	negative	negative	negative	negative	N	N	N	N	Y	Y	Y	N	N	N	N	N				Y	Y	N	Y	N	N	c	b	b	N	0					latrine	Y	N
SLT 072	SL	52	F	83.82	10	14.2333	36.4	72	16	<-3.0	-1	negative	negative	negative	negative	negative	N	N	N	N	N	Y	Y	N	N	N	N	N			tap water	N	Y	Y	N	Y	N	b	b	b	Y	3	Y	b	N	a	latrine	Y	Y
SLT 073	SL	14	F	75	9	16	36.5	106	38			negative	negative				N	N	N	N	Y	Y	Y	N	N	N	N	N			tap water	N	Y	Y	N	Y	N	b	a	b	Y	3	Y	b	N	a	latrine	Y	Y
SLT 074	SL	24	M	83.82	11.3636	16.1742	36.9	110	28	-1	0	negative	negative	negative	negative	negative	N	N	N	Y	N	Y	N	Y	N	N	N	N				Y	N	N	N	N	N	b	b	b	Y	2	Y	b	N	a	latrine	Y	Y
SLT 075	SL	12	M	73	8.18182	15.3534	36.7	105	28	-1	-1.5	negative	negative	negative	negative	negative	N	N	N	Y	N	Y	N	Y	N	N	N	N				Y	N	N	N	N	N	a	b	b	Y	2	Y	b	N	a	latrine	Y	Y
SLT 076	SL	36	F	88.9	10	12.6531	36.9	120	24	-1.5	-2	negative	negative				N	N	N	N	Y	N	N	N	N	N	N	N				chlorinated	N	N	N	N	N	b	b	b	Y	1	Y	a	Y	b	latrine	Y	N
SLT 077	SL	10	M	63	7.86364	19.8126	36.5	80	18	<-3.0	2	negative	negative	negative	negative	negative	N	N	N	N	Y	N	N	N	N	N	N	N				chlorinated	N	N	N	N	N	b	b	b	Y	1	Y	b	N	a	latrine	Y	N
SLT 078	SL	11	M	63	8.45455	21.3014	36.3	96	28	<-3.0	3	negative	negative	negative	negative	negative	N	N	N	Y	N	Y	Y	N	N	N	N	N				N	N	N	N	N	N	b	b	b	Y	1	N	a	Y	b	latrine	Y	N
SLT 079	SL	36	F	91.44	13.6364	16.309	36.9	64	15	-1	0.5	negative	negative				Y	N	N	N	Y	N	N	N	N	N	N	N				Y	N	N	N	N	N	b	b	b	Y	1	Y	b	N	a	latrine	Y	N
SLT 080	SL	7	F	83.82	12.7273	18.1151	35	72	16	>3.0	0.5	negative	negative				N	N	N	N	Y	N	N	N	N	N	N	N				N	N	N	N	N	N	a	a	b	Y	1	N	a	Y	b	latrine	Y	N
SLT 081	SL	12	F	83.82	10.4545	14.8802	36.0556	120	22	>3.0	-1	negative	negative	negative	negative	negative	Y	N	N	N	Y	Y	Y	N	N	N	N	N				Y	N	N	N	N	N	b	b	b	Y	2	N	e	Y	c	other	N	Y
SLT 083	SL	9	M	83.82	10.9091	15.5272	36.3889	110	20	>3.0	-1	negative	negative	negative	negative	negative	Y	N	N	N	Y	N	N	N	N	N	N	N			tap water	Y	N	N	N	N	N	b	b	b	Y	2	Y	c	Y	b	other	N	N
SLT 086	SL	9	F	88.9	14.0909	17.8293	36.2778	78	18	>3.0	1	negative	negative	negative	negative	negative	N	N	N	Y	N	Y	Y	N	N	N	N	N			tap water	Y	Y	N	N	Y	N	a	a	a	Y	2	Y	b	N	a	latrine	N	N
SLT 087	SL	57	F	100.33	15	14.9015	35.7	80	16	-1.5	0	negative	negative	negative	negative	negative	Y	N	N	Y	N	Y	N	Y	N	N	N	N			tap water	Y	Y	Y	Y	Y	N	b	a	b	Y	2	Y	b	N	a	other	N	N
SLT 088	SL	25	F	80.01	10	15.6211	35.7	100	20	-2	0	negative	negative	negative	negative	negative	N	N	N	N	Y	N	N	N	N	N	N	N			tap water	Y	Y	N	Y	Y	N	b	b	b	N	0					other	N	N
SLT 089	SL	36	F	83.82	10.4545	14.8802	36.3	72	16	-3	-0.5	negative	negative	negative	negative	negative	N	N	N	N	Y	N	N	N	N	N	N	N			tap water	Y	N	N	N	N	N	b	a	b	Y	1	Y	b	N		other	Y	Y
SLT 090	SL	48	F	99.06	12.7273	12.97	36.4	96	20	-1	-2	negative	negative				N	N	N	N	Y	N	N	N	N	N	N	N				N	Y	N	Y	N	N	b	a	b	Y	2	N	a	N	a	latrine	N	N
SLT 091	SL	48	M	83.82	15.4545	21.9969	36.3	100	32	<-3.0	>3.0	negative	negative	negative	negative	negative	N	N	N	Y	N	Y	Y	N	N	N	N	N			tap water	Y	N	N	N	N	N	b	a	b	Y	2	N	a	N	a	latrine	Y	N
SLT 092	SL	24	M	83.82	11.8182	16.8211	36.8	120	30	-1	1	negative	negative	negative	negative	negative	N	N	N	Y	N	N	N	N	N	N	N	N			tap water	Y	N	N	N	N	N	b	b	b	N	0					latrine	Y	N
SLT 093	SL	26	F	83.82	12.2727	17.4681	37.1	120	32	-1	1	negative	negative	negative	negative	negative	N	N	N	Y	N	N	N	N	N	N	N	N			tap water	Y	N	N	N	N	N	c	b	b	Y	2	N	b	N	b	latrine	Y	N
SLT 094	SL	57	M	105.41	17.7273	15.9543	36.7778	72	18	-0.5	0	negative	negative	negative	negative	negative	N	N	N	Y	N	N	N	N	N	N	N	N			tap water	Y	Y	Y	Y	N	N	b	b	b	N	0					latrine	N	N
SLT 095	SL	9	M	70	7.5	15.3061	37.4	110	20	0	-2	negative	negative				N	N	N	Y	N	N	N	N	N	N	N	N			tap water	Y	Y	Y	Y	Y	N	b	b	b	N	0					latrine	Y	N
SLT 098	SL	28	F	83.82	11.8182	16.8211	37.1	115	32	-1	1	negative	negative	negative	negative	negative	N	N	N	Y	N	Y	Y	N	N	N	N	N			tap water	Y	Y	N	Y	Y	N	b	b	b	Y	2	N	b	N	a	latrine	Y	N
SLT 099	SL	44	M	93.5	13	14.8703	36.3889	112	30	-2	0	negative	negative				N	N	N	Y	N	Y	Y	N	N	N	N	N			tap water	Y	Y	N	Y	Y	N	b	a	b	Y	4	N	b	N	b	latrine	Y	N
SLT 101	SL	17	F	75	9.5	16.8889	36.6667	88	38	-1.5	1	negative	negative				N	N	N	Y	N	Y	N	N	N	N	Y	N			tap water	Y	N	N	N	N	N	b	b	b	Y	1	N	a	N	a	latrine	N	N
SLT 102	SL	14	F	69	7	14.7028	37.3333	115	38	-2.5	-1	negative	negative				N	N	N	Y	N	N	N	N	N	N	N	N			tap water	Y	N	N	N	N	N	b	b	b	N	0					latrine	N	N
SLT 103	SL	60	M	105	16.3636	14.8423	37.0556	100	30	-1	0	negative	negative				N	N	N	Y	N	Y	Y	N	N	N	N	N			tap water	Y	N	N	N	N	N	a	b	b	Y	3	N	a	N	a	latrine	N	N
SLT 104	SL	24	F	77	13	21.9261	36.2222	110	30	-2.5	>3.0	negative	negative				N	N	N	Y	N	Y	N	N	N	Y	N	N				N	Y	Y	N	Y	N	b	a	b	Y	1	N	b	N	b	latrine	N	N
SLT 105	SL	48	M	100.05	13	12.987	36.8333	88	24	-1	-0.5	negative	negative				N	N	N	Y	N	Y	N	N	N	Y	N	N				N	Y	Y	N	Y	N		b	b	Y	1	N	b	N	b	latrine	N	N
SLT 106	SL	18	F	73	13	24.3948	37.2222	88	24	-2.5	>3.0	negative	negative				N	N	N	Y	Y	N	N	N	N	N	N	N			tap water	Y	N	N	N	N	N	b	a	a	N	0					latrine	N	N
MF180	SL	42	M	97.5	13	13.6752				-1	-1	negative	negative				N	N	Y	N	N	Y	Y	N	N	N	N	N				N	N	N	N	N	N	b	a	a	Y	2	N	a	N	a	latrine	N
MF181	SL	12	F	73.66	16.3636	30.159				0	3	negative	negative				Y	N	Y	N	Y	Y	Y	N	N	N	N	N			tap water	Y	Y	Y	N	N	N	b	a	c	Y	3	Y	b	N	a	latrine	Y	Y
MF182	SL	47	M	103	15.4545	14.5674				0	0	negative	negative				N	N	Y	N	N	Y	Y	N	N	N	N	N			tap water	Y	N	N	N	N	N	b	a	a	Y	2	N	b	N	a	latrine	N
MF183	SL	48	F	100	17.2727	17.2727				-1	1	positive	negative				Y	N	Y	N	N	Y	Y	N	N	N	N	N				N	N	N	N	N	N	b	a	b	Y	3	Y	a	N	g	latrine	Y	N
MF184	SL	42	F	86	10	13.5208				-3	-1	negative	negative				N	N	Y	N	N	Y	Y	N	N	N	N	N				N	Y	Y	N	N	N	b	b	b	Y	4	Y	a	N	g	latrine	Y	N
MF185	SL	49	F	96	15	16.276				-2	0.5	negative	negative				N	N	Y	N	N	Y	Y	N	N	N	N	N				N	N	N	N	N	N	a	g	c	Y	2	N	a	N	a	unsure	Y
MF186	SL	7	F	64	6.5	15.8691				-1.5	-0.5	negative	negative				Y	N	N	Y	N	N	N	N	N	N	N	N			tap water	Y	Y	Y	N	N	N	c	d	d	Y	3	Y	b	Y	f	latrine	Y	N
MF188	SL	48	M	97.5	15.4545	16.2572				-1.5	0.5	negative	negative				N	N	Y	N	N	Y	Y	N	N	N	N	N				N	N	N	N	N	N	g	a	a	Y	2	N	a	N	a	unsure	Y
MF189	SL	36	M	94	13.6364	15.4327				-1.5	0	positive	negative				Y	N	Y	N	N	Y	Y	N	N	N	N	N				N	N	N	N	N	N	b	a	b	Y	3	Y	b	N	a	latrine	Y	Y
MF190	SL	17	M	77	10.2273	17.2496				-2	1	positive	negative				N	N	Y	N	N	Y	Y	N	N	N	N	N				N	Y	Y	N	N	N	a	a	c	Y	10	N	a	N	a	unsure	N	Y
MF191	SL	48	F	104	16.8182	15.5494				0	0.5	negative	negative				Y	N	Y	N	N	Y	Y	N	N	N	N	N			tap water	N	N	N	N	N	N	b	a	b	Y	3	Y	b	Y	b	unsure	N	N
MF192	SL	11	M	62	6.9	17.9501				-3	1	negative	negative				Y	N	Y	N	N	Y	Y	N	N	N	N	N			tap water	Y	N	N	N	N	N	b	b	b	Y	3	Y	b	N	b	latrine	N	N
MF195	SL	23	M	88	13.6364	17.6089				0	2	positive	negative				Y	N	Y	N	N	Y	Y	N	N	N	N	N			tap water	N	Y	Y	N	N	N	b	b	b	Y	5	Y	b	Y	b	latrine	Y	N
MF196	SL	5	M	68	7	15.1384				1	-2	positive	negative	positive	negative	negative	Y	N	Y	N	N	Y	Y	N	N	N	N	N			tap water	Y	N	N	N	N	N	b	b	b	Y	8	Y	b	N	b	unsure	N
MF198	SL	18	F	76.5	9.5	16.2331				-1.5	-0.5	positive	negative				N	N	Y	N	N	Y	N	N	N	N	Y	N				N	Y	Y	N	N	N	c	a	b	Y	8	Y	a	N	g	latrine	N	N
MF199	SL	34	M	89.5	12.2727	15.3213				-1	-0.5	negative	negative				Y	N	Y	N	N	Y	N	N	N	N	Y	N				N	N	N	N	N	N	a	a	a	Y	4	N	a	N	g	latrine	N	N
MF200	SL	6	F	65	7.25	17.1598				0	0	negative	negative				N	N	Y	N	N	Y	N	N	N	N	Y	N				N	N	N	N	N	N	a	a	b	Y	1	N	b	N	g	latrine	Y	N
MF201	SL	66	M	106	16.8182	14.9681				-1	0	negative	negative				N	N	Y	N	N	Y	N	N	N	N	Y	N				N	N	N	N	N	N	a	a	b	N	0					latrine	Y	N
MF202	SL	36	M	96	14.5455	15.7828				0	0	negative	negative				N	N	Y	N	N	Y	Y	N	N	N	N	N				N	Y	Y	N	N	N	b	b	b	Y	2	Y	g	N	g	latrine	Y	N
MF203	SL	14	M	73	8.9	16.7011				-2	0	negative	negative				N	N	Y	N	N	Y	Y	N	N	N	N	N				N	Y	Y	N	N	N	b	b	b	Y	2	Y	g	N	g	latrine	Y	N
MF205	SL	56	M	103	15.4545	14.5674				-1	0	negative	positive				Y	N	Y	N	N	Y	Y	N	N	N	N	N			tap water	Y	N	N	N	N	N	g	b	b	Y	9	Y	b	N	a	suspended_latrine	N	N
MF206	SL	3	M	53	4.4	15.6639				-3	-1	negative	negative				Y	N	Y	N	N	Y	Y	N	N	N	N	N			tap water	Y	N	N	N	N	N	b	a	b	Y	6	Y	a	N	a	unsure	Y	N
MF207	SL	25	F	83	11.3636	16.4953				-1	0	negative	negative				Y	N	Y	N	N	Y	Y	N	N	N	N	N			tap water	Y	N	N	N	N	N	b	a	a	Y	5		b	N	a	latrine	Y
MF208	SL	8	M	68	7.7	16.6522				-1	0	negative	negative				Y	N	Y	N	N	Y	Y	N	N	N	N	N			tap water	Y	N	N	N	N	N	b	c	a	Y	6	Y	b	N	b		Y
SP1	SP	48	F	91	19.0909	23.0539	36.9			-2.5	>3.0	negative	negative				N	Y	N	N	Y	Y	N	Y	N	N	N	N			tap water	Y	N	N	N	N	N	b	b	c	N	0					suspended_latrine	Y	Y
SP2	SP	21	M	95	16	17.7285	37		28	>3.0	1.5	negative	negative				N	Y	N	Y	N	Y	Y	N	N	N	N	N				N	N	N	N	N	N	b	c	c	Y	2	N	b	N	b	latrine	N	N
SP3	SP	8	F	99	18	18.3655	37		22	>3.0	1	negative	negative				N	N	N	Y	N	Y	Y	N	N	N	N	N				N	N	N	N	N	N	c	c	c	Y	2	N	c	N	c	latrine	N	N
SP4	SP	48	M	95	14	15.5125	37		28	-2	0.5	negative	negative				N	N	N	N	N	Y	Y	N	N	N	N	N				N	Y	N	Y	N	N	b	b	b	Y	2	N	b	N	b	latrine	N	N
SP5	SP	31	M	68	8.1	17.5173	37			<-3.0	2	negative	negative				N	N	N	Y	N	Y	Y	N	N	N	N	N				N	Y	N	Y	N	N	d	c	c	Y	2	N	b	N	b	latrine	N	N
SP6	SP	18	M	97	15.4545	16.4253	37			>3.0	0	negative	negative				N	N	Y	N	N	Y	Y	N	N	Y	N	N			tap water	Y	Y	Y	Y	Y	N	b	b	b	N	0					suspended_latrine	N	N
SP7	SP	60	M	75	13.6364	24.2424	37			<-3.0	>3.0	negative	negative				N	N	N	Y	N	Y	N	N	N	Y	N	N				Y	N	N	N	N	N	d	a	a	Y	1	N	b	N	a	suspended_latrine	N	N
SP8	SP	60	M	90	17.2727	21.3244	37			<-3.0	>3.0	negative	negative				N	N	N	Y	N	Y	N	N	N	N	N	Y			tap water	Y	Y	N	Y	Y	N	a	b	b	Y	4	N	b	N	b	suspended_latrine	N	Y
SP9	SP	60	M	65	9.09091	21.5169	37			<-3.0	>3.0	negative	negative				N	N	N	Y	N	Y	N	N	N	N	N	Y			tap water	Y	Y	N	Y	Y	N	b	a	b	Y	5	N	b	N	b	suspended_latrine	N	Y
SP10	SP	60	M	78	12.7273	20.9193	37			<-3.0	>3.0	negative	negative				N	N	N	Y	N	Y	N	N	Y	N	N	N				N	N	N	N	N	N	g	g	b	Y	1	Y	b	N	a	latrine	N	N
SP11	SP	60	F	99	8.04545	8.20881	36.5	92	26	-2	<-3.0	negative	negative				N	Y	N	N	N	Y	N	N	N	N	N	Y				N	Y	N	Y	N	N	b	c	b	Y	1	N	a	Y	b	suspended_latrine	N	Y
SP12	SP	60	M	95	15.9091	17.6278	37			<-3.0	2	negative	negative				N	N	N	Y	N	Y	N	N	N	N	Y	N				Y	N	N	N	N	N	b	a	b	Y	1	N	b	N	a	suspended_latrine	N	Y
SP13	SP	44	M	65	9.09091	21.5169	37			<-3.0	>3.0	negative	negative				N	N	N	Y	N	Y	N	N	N	N	Y	N				Y	N	N	N	N	N	b	a	b	Y	1	N	b	N	b	suspended_latrine	uncertain	Y
SP14	SP	25	M	74	9	16.4354	37	100		<-3.0	0.5	negative	negative				N	N	N	Y	N	Y	Y	N	N	N	N	N				Y	Y	N	Y	N	N	d	b	c	Y	4	N	b	N	b	suspended_latrine	Y	Y
SP15	SP	58	F	67	7.18182	15.9987	37	112	36	<-3.0	0.5	negative	negative				N	N	N	Y	N	Y	N	N	N	N	Y	N			tap water	Y	Y	Y	N	N	N	b	a	a	Y	2	N	a	Y	b	suspended_latrine	N	Y
SP16	SP	32	M	65.5	7.63636	17.7993	37	108	32	<-3.0	2	negative	negative	negative	negative	negative	N	N	Y	N	N	Y	N	N	N	N	N	Y				Y	N	N	N	N	N	b	b	b	Y	2	N	a	N	a	suspended_latrine	Y	Y
SP17	SP	27	M	72	9.09091	17.5365	37	100	28	<-3.0	2	negative	negative				N	N	N	Y	N	Y	N	N	N	Y	N	N				Y	N	N	N	N	N	a	a	d	Y	2	N	a	N	a	suspended_latrine	N	N
SP18	SP	48	F	67.8	7.27273	15.8211	36.8	112	32	<-3.0	0.5	negative	negative				N	N	N	Y	N	Y	Y	N	N	N	N	N				Y	N	N	N	N	N	a	a	c	Y	3	N	a	N	a	suspended_latrine	N	Y
SP19	SP	59	F	80	9.90909	15.483	37	96	26	<-3.0	0	negative	negative				N	N	N	Y	N	Y	Y	N	N	N	N	N			tap water	Y	Y	Y	N	N	Y	e	b	b	N	0					suspended_latrine	Y	Y
SP20	SP	12	M	76	9.90909	17.1556	36.7	92	28	0	0	negative	negative				N	N	Y	Y	N	Y	N	N	N	N	Y	N		Y		Y	Y	N	N	Y	N	c	c	b	Y	1	N	b	N	a	suspended_latrine	N	Y
SP21	SP	17	M	76	18.6364	32.2652	36.5	92	26	-2	>3.0	negative	negative				N	N	N	N	Y	N	N	N	N	N	N	N			tap water	Y	Y	N	N	Y	N	f	b	b	N	0					suspended_latrine	Y	Y
SP22	SP	6	M	63	9.09091	22.9048	37	66	30	-2.5	>3.0	negative	negative	negative	negative	negative	N	N	N	Y	N	Y	N	N	N	N	N	Y				N	N	N	N	N	N	b	b	b	N	0					suspended_latrine	N	N
SP23	SP	10	F	82.5	11.3636	16.6959	37			>3.0	0.5	negative	negative				N	N	N	Y	Y	Y	Y	N	N	N	N	N			tap water	Y	Y	N	Y	N	N	a	a	c	N	0					suspended_latrine	N	Y
SP24	SP	11	M	72	10	19.2901	37			-1	1.5	negative	negative				N	N	N	Y	N	Y	Y	N	N	N	Y	N				Y	Y	Y	N	Y	N	b	a	b	Y	3	Y	b	N	a	latrine	N	N
SP25	SP	3	M	76	14.5455	25.1826	37			>3.0	>3.0	negative	negative				N	N	N	Y	N	Y	N	N	N	N	Y	N				Y	N	N	N	N	N	c	a	c	Y	1	N	a	N	a	latrine	N	Y
SP26	SP	27	M	81	12.7273	19.3984	37			-1	2	negative	negative				N	N	N	Y	N	Y	N	N	N	N	Y	N				N	Y	N	N	Y	N	b	a	a	Y	1	N	a	N	a	latrine	N	N
SP27	SP	36	M	73	10	18.7652	37			<-3.0	2.5	negative	negative				N	N	N	Y	N	Y	Y	N	N	Y	N	N				Y	Y	N	Y	N	N	b	a	b	Y	1	Y	d	Y	c	suspended_latrine	N	N
SP28	SP	30	F	64	7.27273	17.7557	37			<-3.0	1.5	negative	negative	negative	negative	negative	N	N	N	Y	N	Y	Y	N	N	N	N	N				Y	N	N	N	N	N	c	a	a	Y	2	N	b	N	a	suspended_latrine	Y	N
SP29	SP	31	M	86	10.9091	14.75	37			-2	0	negative	negative				N	N	N	Y	N	Y	Y	N	N	N	N	N				Y	N	N	N	N	N	b	a	a	Y	2	N	a	N	a	suspended_latrine	Y	N
SP30	SP	6	M	86.5	13.1818	17.6175	37			>3.0	0.5	negative	negative				N	N	N	Y	Y	Y	N	N	N	N	N	N			tap water	Y	N	N	N	N	N	b	a	b	Y	2	Y	b	N	a	suspended_latrine	N	Y
SP32	SP	20	M	75	10.9091	19.3939				-3	2	negative	negative				N	N	N	N	Y	N	N	N	N	N	N	N			tap water	Y	N	N	N	N	N	b	b	b	Y	2	Y	b	Y	b	suspended_latrine	N	N
SP33	SP	13	M	77	9.54545	16.0996	36.5			0	-0.5	negative	negative				N	N	N	Y	Y	N	N	N	N	N	N	N			tap water	Y	Y	Y	Y	N	N	e	a	a	Y	2	N	a	Y	g	suspended_latrine	N	Y
SP34	SP	36	F	63	5.96364	15.0255				<-3.0	0	negative	negative				Y	N	N	Y	N	Y	Y	N	N	N	N	N			tap water	Y	Y	N	N	Y	N	c	a	b	Y	1	N	a	Y	c	suspended_latrine	Y	N
SP35	SP	24	M	62	6.86364	17.8555				<-3.0	1.5	negative	positive	negative	negative	negative	N	Y	N	N	N	Y	Y	Y	N	N	N	N			tap water	Y	Y	Y	N	Y	N	f	a	a	Y	1	N	a	N	a	suspended_latrine	N	Y
SP36	SP	14	M	73	8.6	16.1381				-2	-0.5	negative	positive	negative	negative	negative	N	N	Y	N	N	Y	N	N	N	Y	N	N				Y	Y	N	N	Y	N	a	a	b	Y	1	N	a	Y	b	suspended_latrine	Y	Y
SP37	SP	3	M	95	13.6	15.0693				>3.0	-1.5	negative	negative				N	N	N	Y	N	Y	N	N	N	Y	N	N				Y	N	N	N	N	N	b	b	b	Y	1	N	a	N	a	suspended_latrine	Y	N
SP38	SP	29	F	98	13.6	14.1608				<-3.0	-1.5	negative	negative				N	N	N	Y	N	Y	N	N	N	Y	N	N				Y	Y	N	N	Y	N	b	c	b	Y	1	Y	d	N	a	suspended_latrine	N	N
SP39	SP	48	F	62	7.1	18.4703				2	1.5	negative	negative				N	N	Y	N	N	Y	Y	N	N	N	N	N			tap water	Y	N	N	N	N	N	a	e	c	N	0					latrine	N	Y
SP40	SP	29	F	86	12.7	17.1714				<-3.0	1	negative	negative				N	N	N	Y	Y	Y	N	N	N	N	N	N				Y	N	N	N	N	N	b	b	b	N	0					latrine	Y	Y
SP41	SP	18	M	70	8.54545	17.4397	37			<-3.0	0.5	negative	negative				N	N	N	Y	Y	Y	Y	N	N	N	N	N				Y	Y	Y	N	N	N	b	b	b	Y	3	N	b	N	a	suspended_latrine	N	Y
SP42	SP	18	F	90	11.3636	14.0292	36			>3.0	0	negative	negative				N	N	N	Y	Y	Y	Y	N	N	N	N	N				Y	Y	Y	N	N	N	c	a	c	Y	3	N	a	N	a	suspended_latrine	N	Y
SP43	SP	6	M	73	9	16.8887				>3.0	0	negative	negative				N	N	N	Y	N	Y	N	N	N	Y	N	N			tap water	Y	Y	N	Y	N	N	b	b	b	Y	5	N	a	N	a	latrine	N	N
SP44	SP	4	M	92	12.7273	15.0369				>3.0	-1.5	negative	negative				N	N	N	Y	N	Y	N	N	N	Y	N	N			tap water	Y	Y	N	Y	N	N	b	a	b	Y	5	N	b	N	a	latrine	N	N
SP46	SP	15	F	90	12.2	15.0617				>3.0	-1	negative	negative				N	N	N	Y	Y	N	N	N	N	N	N	N			tap water	Y	N	N	N	N	N	e	b	d	N	0					suspended_latrine	Y	Y
SP47	SP	48	F	85.5	11.8182	16.1666				<-3.0	0.5	negative	negative				Y	N	N	Y	N	Y	N	N	N	Y	N	N			tap water	Y	Y	N	Y	N	N	d	a	b	Y	4	Y	b	Y	b	latrine	N	Y
SP048	SP	48	F	101.5	19.0909	18.5308				-0.5	2	negative	negative				N	N	N	Y	N	Y	N	N	N	N	Y	N			tap water	Y	N	N	N	N	N	b	b	b	Y	4	Y	b	Y	b	latrine	N	Y
SP049	SP	4	M	80.5	11.2727	17.3955				>3.0	0	negative	negative				N	N	N	Y	N	Y	N	N	N	N	Y	N			tap water	Y	Y	N	N	Y	N	b	a	b	Y	1	N	b	N	a	suspended_latrine	N	Y
SP050	SP	36	M	64	8.40909	20.53				<-3.0	>3.0	negative	negative				N	N	N	Y	N	Y	N	N	N	Y	N	N			tap water	Y	N	N	N	N	N	b	a	b	Y	1	N	b	N	b	latrine	Y	Y
SP051	SP	33	M	97	16.3636	17.3915				-1	1	negative	negative				N	N	N	Y	N	Y	N	N	N	Y	N	N			tap water	chlorinated	N	N	N	N	N	b	b	a	Y	1	N	b	N	b	latrine	Y	Y
SP052	SP	11	M	91.5	16.8182	20.088				>3.0	2	negative	negative				N	N	N	Y	N	Y	N	N	N	Y	N	N			tap water	Y	N	N	N	N	N	b	a	b	N	0					suspended_latrine	Y	Y
SP053	SP	36	F	76	10	17.313				<-3.0	1	negative	negative				N	N	N	Y	N	N	N	N	N	N	N	N			tap water	Y	N	N	N	N	N	b	b	b	Y	1		g		g	suspended_latrine	uncertain	Y
SP054	SP	12	M	106.3	17.27	15.2836				>3.0	-1.5	negative	negative				N	N	N	N	Y	N	N	N	N	N	N	N			tap water	Y	N	N	N	N	N	a	a	b	Y	2	N	a	N	a	suspended_latrine	N	N
SP055	SP	59	F									negative	negative				N	N	N	Y	Y	Y	Y	N	N	N	N	N			tap water	Y	Y	N	N	Y	N	a	b	b	Y	2	N	b	N	a	suspended_latrine	N	N
SP056	SP	34	M									negative	positive	negative	negative	negative	N	N	N	N	Y	N	N	N	N	N	N	N			tap water	Y	N	N	N	N	N	b	b	b	Y	2	Y	b	N	b	latrine	N	Y
SP057	SP	33	M	102	13.6364	13.1068				2.5	-2.5	negative	negative				N	N	N	Y	Y	Y	Y	N	N	N	N	N				Y	Y	N	Y	Y	N	b	a	b	N	0					suspended_latrine	N	N
SP058	SP	6	F	103	15.9091	14.9958				>3.0	-1	negative	negative				N	N	N	N	Y	N	N	N	N	N	N	N			tap water	Y	N	N	N	N	N	b	a	b	Y	2	N	b	N	a	suspended_latrine	N	Y
SP059	SP	49	M	103.2	15.9091	14.9378				0	-0.5	negative	negative				N	N	N	N	Y	N	N	N	N	N	N	N			tap water	Y	N	N	N	N	N	b	a	b	Y	2	Y	b	N	a	suspended_latrine	N	Y
SP060	SP	23	M	91	14.0909	17.016				1.5	1	negative	negative	negative	negative	negative	N	N	N	Y	N	Y	N	N	N	Y	N	N			tap water	Y	Y	N	Y	N	N	b	b	b	Y	1	N	b	N	b	suspended_latrine	N	Y
SP061	SP	46	M	84	11.3636	16.1049				<-3.0	0.5	negative	negative				N	N	N	Y	Y	N	N	N	N	N	N	N			tap water	Y	N	N	N	N	N	b	a	b	Y	2	N	b	N	b	suspended_latrine	N	Y
SP062	SP	10	F	102	15.9091	15.2913				>3.0	-1	negative	negative				N	N	N	Y	N	Y	N	N	N	Y	N	N				Y	N	N	N	N	N	b	a	b	N	0					latrine	N	Y
MF 001	TL	48	F	96.52	14.9	15.9938	37.5	76	12	-1.5	0.5	negative	negative				N	N	Y	N	N	Y	Y	N	N	N	N	N				N	Y	Y	N	N	N	c	b	b	Y	1	N	b	N	b	latrine	Y	Y
MF 002	TL	48	F	66	8.40909	19.3046	37.5	60	20	<-3.0	2.5	negative	negative				N	N	Y	N	N	Y	Y	N	N	N	N	N				N	N	N	N	N	N	b	a	b	Y	2	Y	b	N	a	latrine	Y	Y
MF 007	TL	12	F	93.98	14.9	16.87	36.4444	60	20	>3.0	2	negative	negative	negative	negative	negative	N	N	Y	N	N	Y	Y	N	N	N	N	N				N	N	N	N	N	N	b	d	d	Y	2	Y	b	N	b	latrine	Y	Y
MF 008	TL	48	F	97.79	15	15.6856	37.5	64	12	-2	0.5	positive	negative	positive	negative	positive	N	N	Y	N	N	N	N	N	N	N	N	N			tap water	Y	N	N	N	N	N	a	a	g	Y	5	N	a	N	a	latrine	Y	Y
MF 009	TL	36	F	82.55	11.7	17.1693	37.5	84	12	<-3.0	1	negative	negative				N	N	Y	N	N	Y	Y	N	N	N	N	N				N	Y	Y	N	N	N	c	b	b	Y	1	N	b	N	b	latrine	Y	Y
MF 012	TL	58	M	99.06	17	17.3242	36.1111	68	24	-2	1	positive	negative	negative	negative	negative	N	N	Y	N	N	N	N	N	N	N	N	N			tap water	Y	N	N	N	N	N	b	b	a	Y	10	Y	b	Y	b	latrine	N	N
MF 014	TL	48	M	91.44	14.7	17.5811	37.5	84	12	-3	2	negative	negative				Y	N	Y	N	N	Y	Y	N	N	N	N	N				N	Y	Y	N	N	N	b	b	a	Y	1	Y	g	Y	b	latrine	Y	N
MF 015	TL	48	F	136	12.5	6.75822	36.5556	62	24	>3.0	<-3.0	negative	negative				N	N	Y	Y	N	Y	Y	N	N	N	N	N				N	N	N	N	N	N	f	b	a	Y	1	N	b	Y	a	latrine	N	N
MF 016	TL	48	F	140	16	8.16327	36.3333	62	24	>3.0	<-3.0	positive	negative	positive	negative	positive	N	N	Y	N	N	N	N	N	N	N	N	N			tap water	Y	N	N	N	N	N	d	a	d	Y	6	N	a	N	a	latrine	N	N
MF 017	TL	48	M	91.44	14	16.7439	37.5	72	12	-3	1	positive	negative	positive	negative	negative	N	N	Y	N	N	N	N	N	N	N	N	N			tap water	Y	N	N	N	N	N	d	a	d	Y	6	N	a	N	a	latrine	N	N
MF 018	TL	48	F	140	18.3	9.33673	35.9444	62	20	>3.0	<-3.0	negative	negative				N	N	Y	N	N	Y	Y	N	N	N	N	N			tap water	Y	Y	Y	N	N	N	b	a	b	Y	3	N	a	N	a	latrine	N	N
MF 019	TL	48	M	73	9.5	17.827	36.1667	76	26	<-3.0	2	negative	negative				N	N	Y	N	N	Y	Y	N	N	N	N	N			tap water	Y	Y	Y	N	N	N	b	a	b	Y	3	N	a	N	a	latrine	N	N
MF 020	TL	48	M	91.44	14.5	17.3419	37.5	80	12	-3	1	negative	negative	negative	negative	negative	N	N	Y	N	N	Y	Y	N	N	N	N	N			tap water	Y	Y	Y	N	N	N	a	a	b	Y	3	N	b	N	a	latrine	N	N
MF 021	TL	48	M	91.44	14.5	17.3419	37.5	80	12	-3	1	negative	negative	negative	negative	negative	N	N	N	Y	N	N	N	N	N	N	N	N			tap water	Y	Y	Y	N	N	N	a	a	b	Y	3	N	b	N	a	latrine	N	N
MF 022	TL	48	M	96.52	15	16.1011	37.5	72	12	-1.5	0.5	positive	negative	positive	negative	negative	Y	N	N	Y	N	N	N	N	N	N	N	N			tap water	Y	Y	Y	Y	Y	N	a	b	b	Y	3	Y	b	Y	b	latrine	N	N
MF 023	TL	36	M	134	13	7.23992	35.8333	68	36	>3.0	<-3.0	positive	negative	positive	negative	negative	N	N	Y	N	N	Y	N	N	Y	N	Y	N				N	Y	Y	Y	Y	N	a	b	b	Y	3	Y	b	Y	b	latrine	N	N
MF 024	TL	36	M	139	13	6.72843	35.7778	68	24	>3.0	<-3.0	negative	negative				N	N	Y	N	N	Y	N	N	N	N	Y	N				N	Y	N	Y	N	N	b	a	b	Y	8	Y	b	N	a	latrine	N	N
MF 025	TL	31	M	81.28	11	16.6504	36.1667	62	30	<-3.0	1	negative	negative				Y	N	Y	N	N	Y	Y	N	N	N	N	N				N	Y	Y	Y	N	N	e	a	b	N	0					latrine	Y	N
MF 026	TL	36	F	136	14.7	7.94766	36.3333	68	24	>3.0	<-3.0	negative	negative	negative	negative	negative	Y	N	Y	N	N	Y	Y	N	N	N	N	N				N	Y	Y	Y	N	N	e	a	b	Y	2	N	b	N	b	latrine	Y	N
MF 028	TL	24	M	135	14.5	7.9561	35.8333	64	24	>3.0	<-3.0	negative	negative				N	Y	N	N	N	Y	N	N	N	Y	N	N			tap water	Y	Y	Y	N	N	N	c	e	d	Y	4	N	a	N	a	latrine	Y	Y
MF 029	TL	17	M	75	9.7	17.2444	37.5	78	26	-2.5	0.5	negative	negative				N	N	Y	N	N	N	N	N	N	N	N	N			tap water	Y	Y	N	Y	N	N	b	a	a	Y	4	Y	b	N	a	latrine	N	N
MF 031	TL	12	F	77	17.2	29.01	38.5	72	18	1	>3.0	positive	negative	positive	negative	negative	N	N	N	Y	N	Y	Y	N	N	N	N	N				N	Y	Y	N	Y	N	b	b	b	Y	5	N	g	N	g	latrine	N	N
MF 032	TL	12	M	73	9.5	17.827	36.1667	76	26	-1	1	negative	negative				N	N	N	Y	N	Y	Y	N	N	N	N	N				N	Y	Y	N	Y	N	b	b	b	Y	5	N	g	N	g	latrine	N	N
MF 033	TL	24	F	60	10.5	29.1667	36.1111	70	24	<-3.0	>3.0	positive	negative	positive	negative	negative	N	N	Y	N	N	Y	Y	N	N	N	N	N				N	Y	Y	Y	Y	N	c	a	b	N	0					suspended_latrine	N	N
MF 034	TL	48	F	96.52	15.7	16.8525	37.5	72	14	-1.5	1	negative	negative				N	N	Y	N	N	Y	N	N	N	N	N	Y			tap water	Y	N	N	N	Y	N	a	a	b	Y	6	Y	b	N	a	latrine	N	N
MF 035	TL	12	M	73	8.3	15.5752	35.7778	70	20	-1	0.5	negative	negative	negative	negative	negative	N	N	Y	N	N	N	N	N	N	N	N	N			tap water	Y	Y	N	Y	N	N	e	a	f	Y	4	N	a	N	b	latrine	N	N
MF 036	TL	5	M	65	9.3	22.0118	36.1667	80	24	-0.5	3	negative	negative				N	N	Y	N	N	N	N	N	N	N	N	N			tap water	Y	Y	N	Y	N	N	d	a	d	Y	4	N	b	N	a	latrine	N	N
MF 037	TL	48	F	93.98	14.1	15.9642	37.5	80	14	-2.5	0.5	negative	negative	negative	negative	negative	N	N	Y	N	N	N	N	N	N	N	N	N			tap water	Y	Y	Y	N	N	N	b	a	a	Y	4	Y	f	Y	e	latrine	Y	N
MF 038	TL	5	M	60	7.5	20.8333	37.5	80	14	-3	2.5	negative	negative	negative	negative	negative	N	N	Y	N	N	Y	Y	N	N	N	N	N				N	Y	Y	N	N	N	b	g	b	Y	1	Y	g	Y	b	latrine	Y	N
MF 039	TL	24	F	78	11	18.0802	37.5	94	16	-2.5	1.5	positive	negative	positive	negative	negative	N	N	Y	N	N	N	N	N	N	N	N	N			tap water	Y	Y	Y	N	N	N	b	a	b	Y	4	Y	f	Y	e	latrine	Y	N
																												N				N		N	N	N	N
																										ecofiltro		N	*UVA filter			N		N	N	N	N
																																N		N	N	N	N
[truncated: 9 more columns]
